# Supplementary material for: Integrated genomic analysis reveals mutated ELF3 as a potential gallbladder cancer vaccine candidate
Source: PubMed Central journal article supplement (PMC7445288; doi:10.1038/s41467-020-17880-4), 2020-08-24
Supplement: 41467_2020_17880_MOESM1_ESM.pdf [file 41467_2020_17880_MOESM1_ESM.pdf]

## **Supplementary Information**

Integrated genomic analysis reveals mutated ELF3 as a potential gallbladder cancer vaccine candidate

Pandey et al

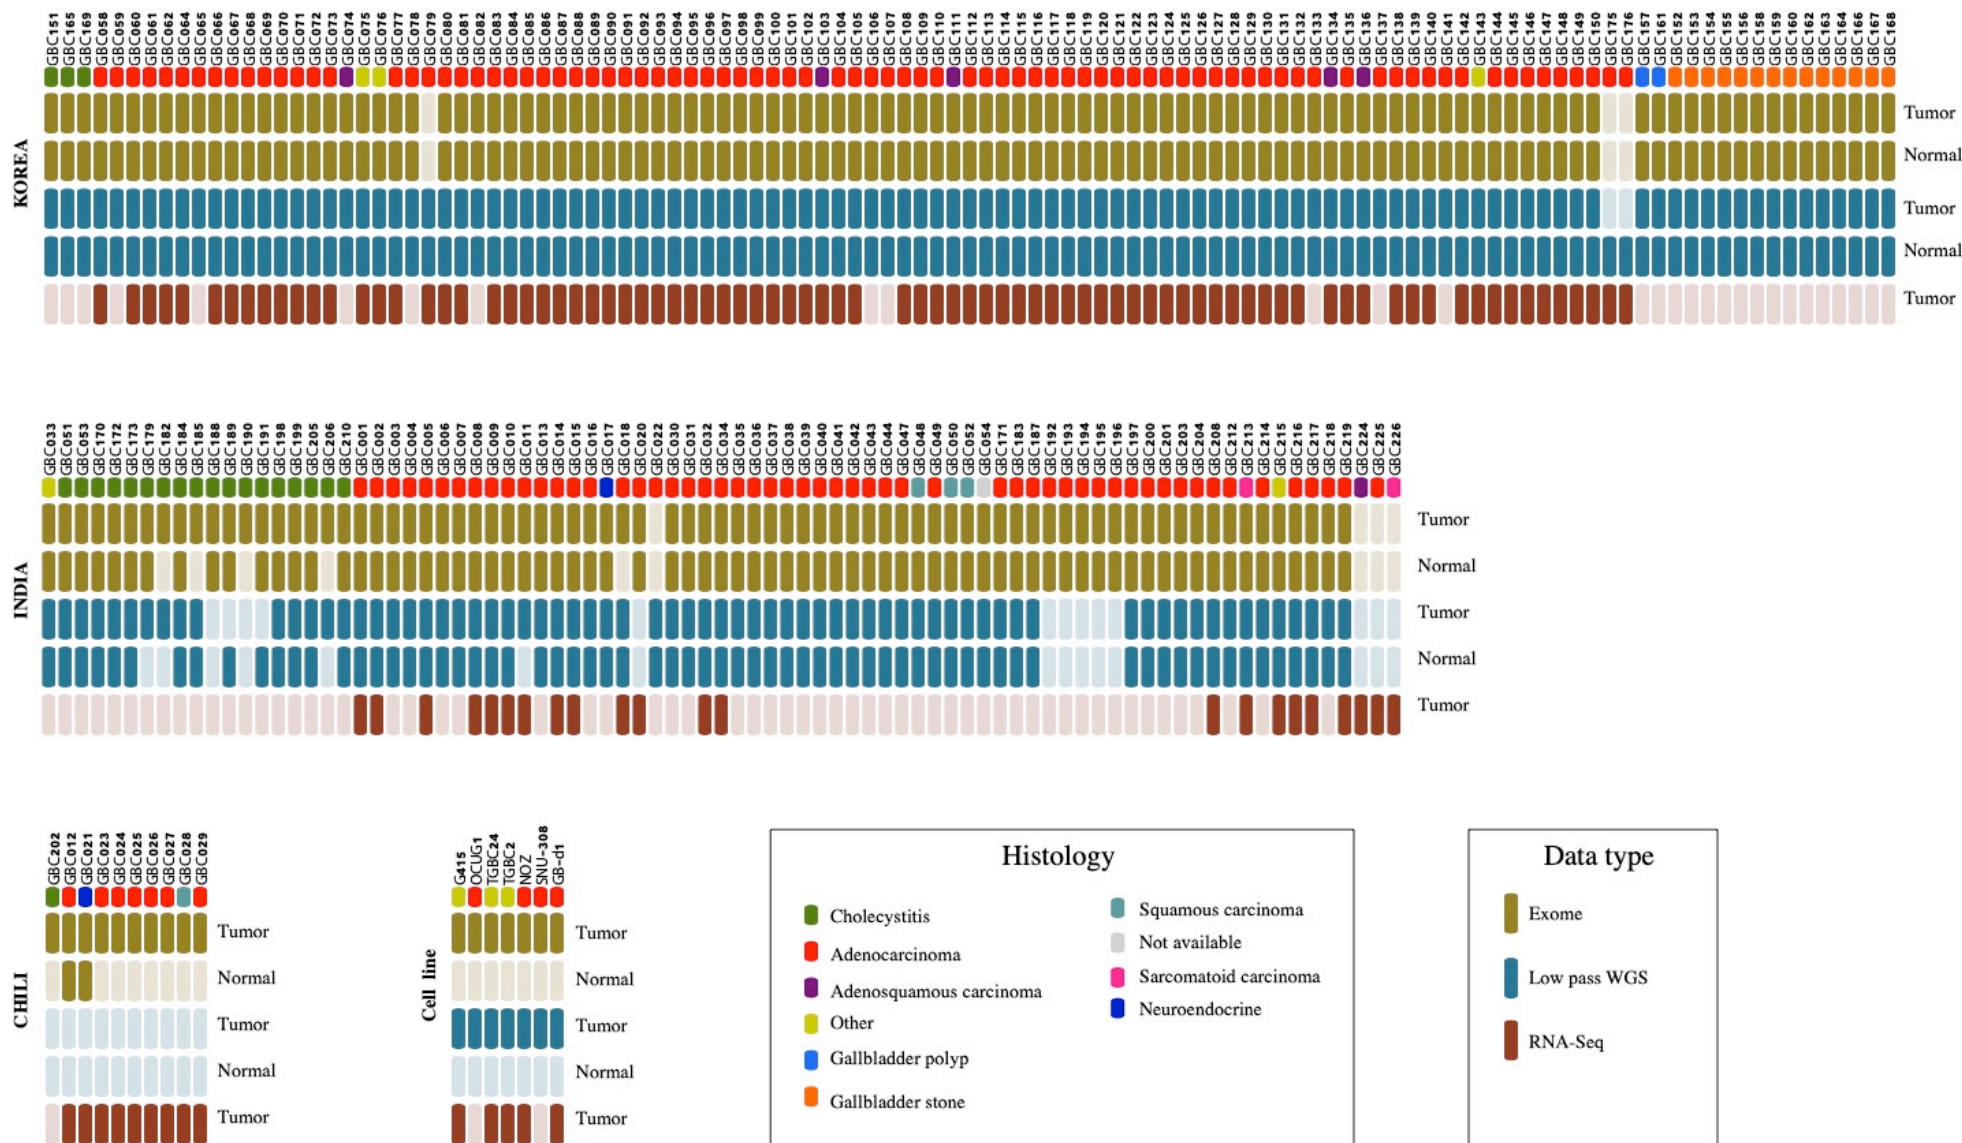

Supplementary Fig. 1. Overview of GBC samples and data types collected.

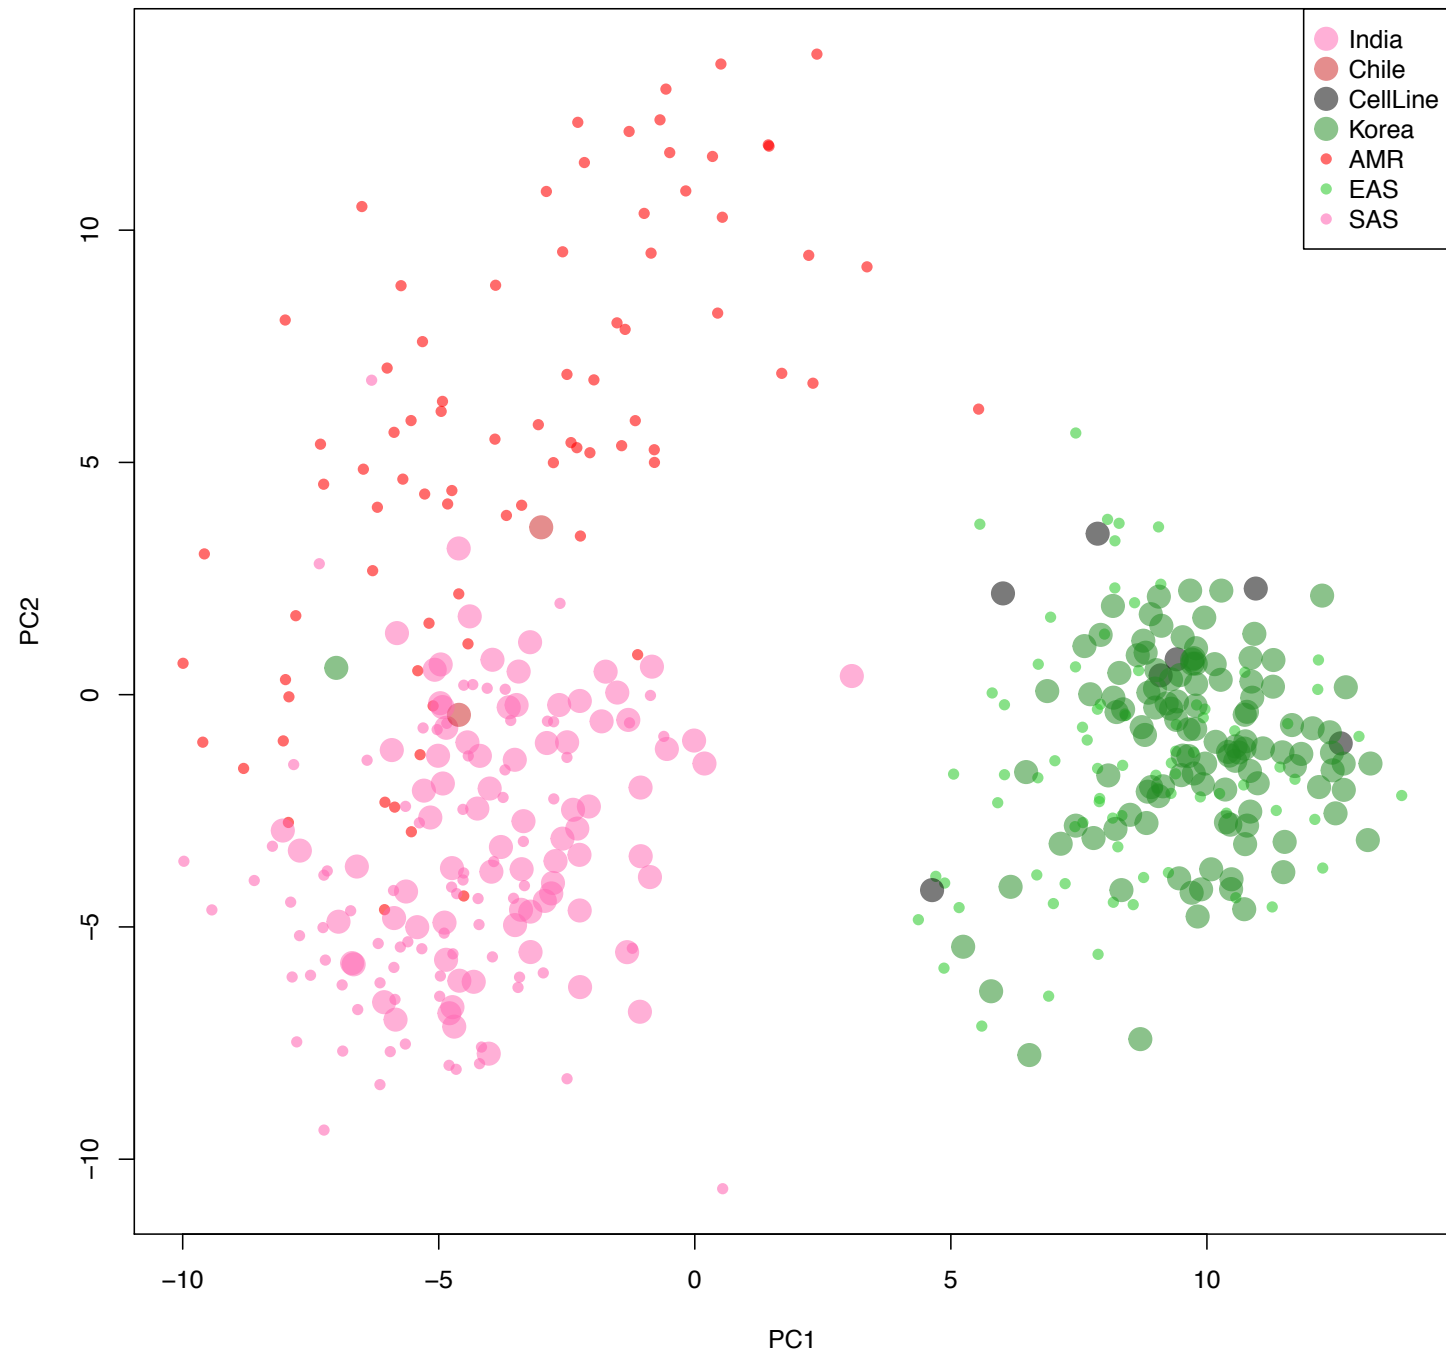

**Supplementary Fig. 2. Principal component analysis of germline variants in GBC, GBC cell lines and 1000 genomes data (AMR, EAS and SAS populations).**

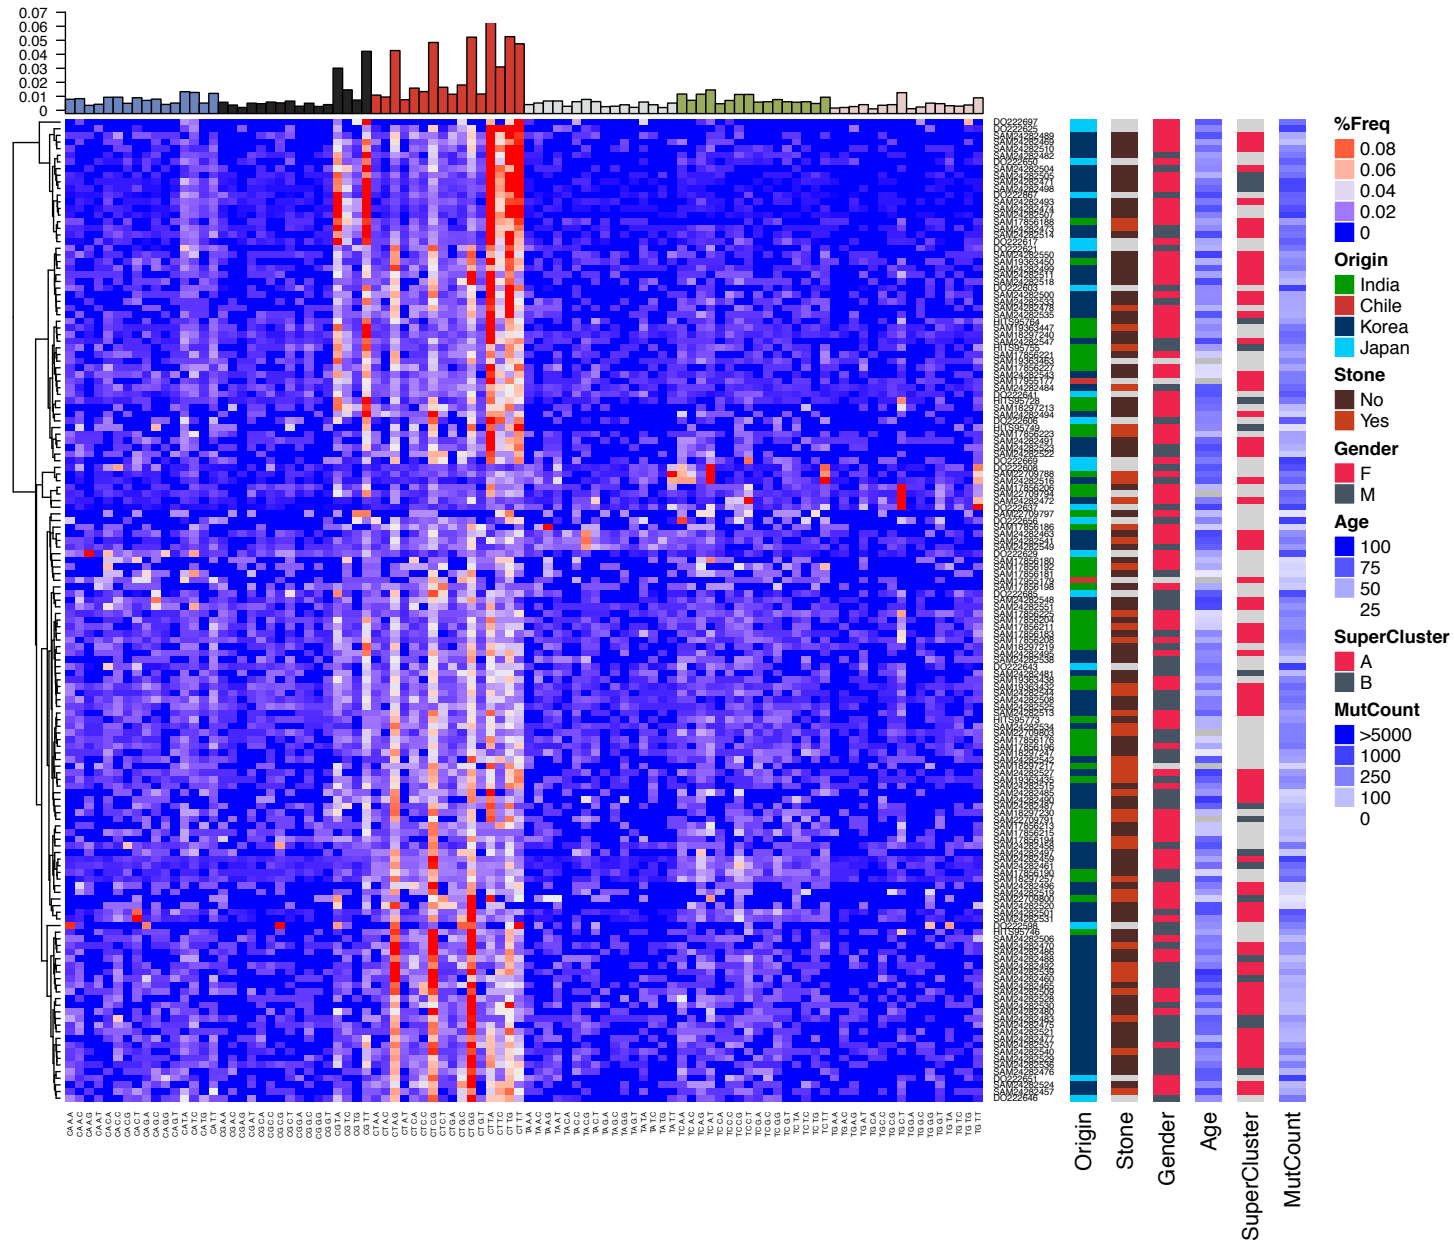

Supplementary Fig. 3. Unsupervised clustering of GBC samples based on observed somatic base substitution frequencies. Each row represents a sample.

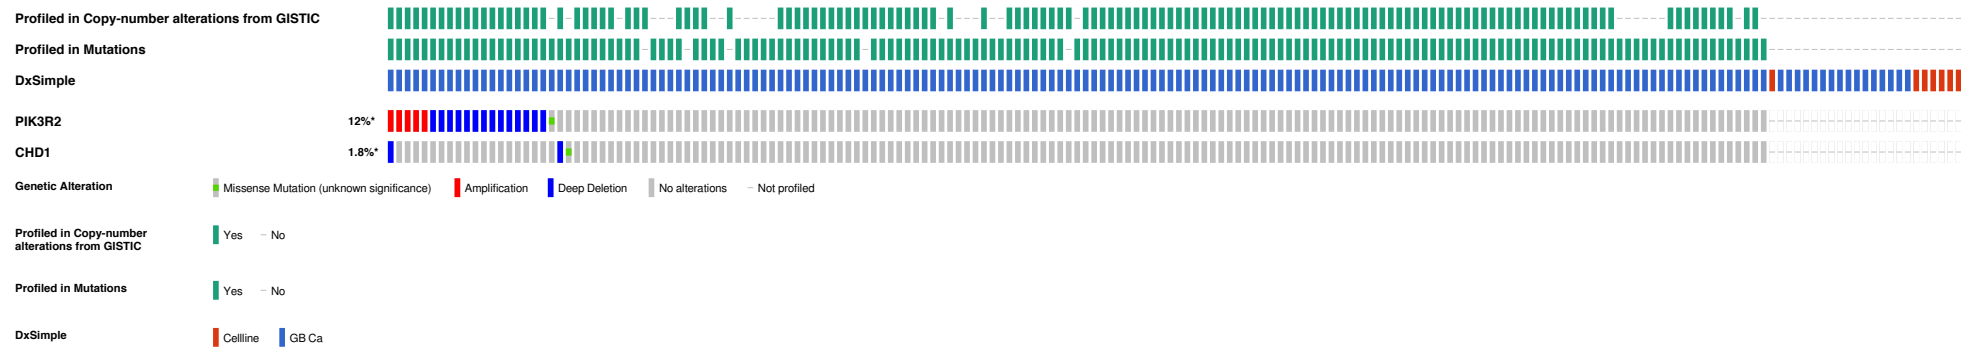

Supplementary Fig. 4. *PIK3R2* and *CHD1* alterations in GBC and GBC cell lines.

**a**

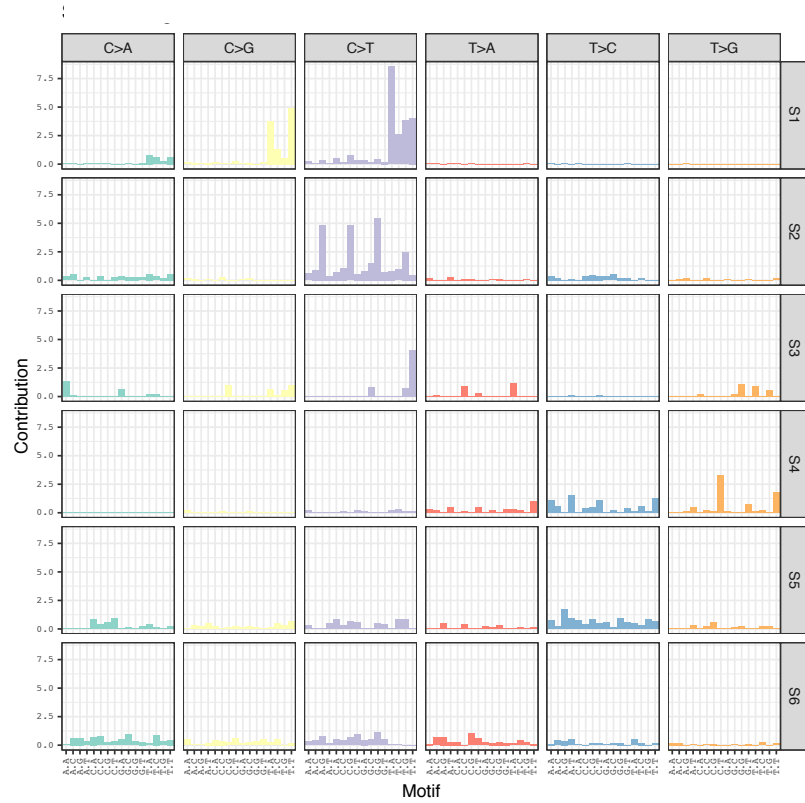

**b**

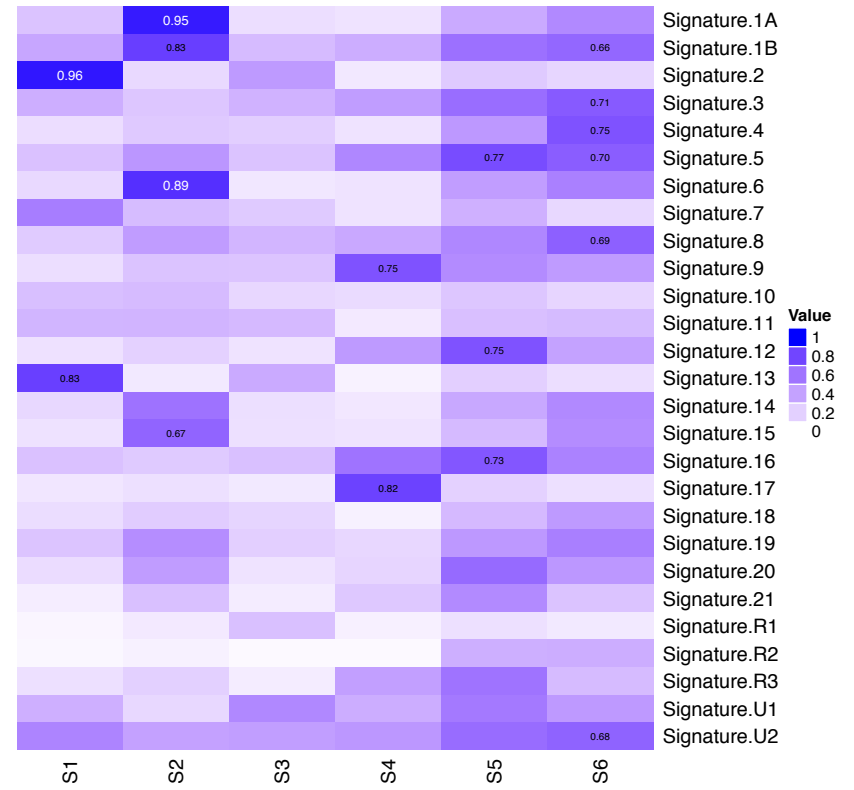

**Supplementary Fig. 5. a**, Six prominent somatic base substitution signatures found by NMF. **b**, Potential mutational processes responsible for signatures in this study inferred from established signatures shown on the right<sup>1</sup> linked to mutational process.

**a**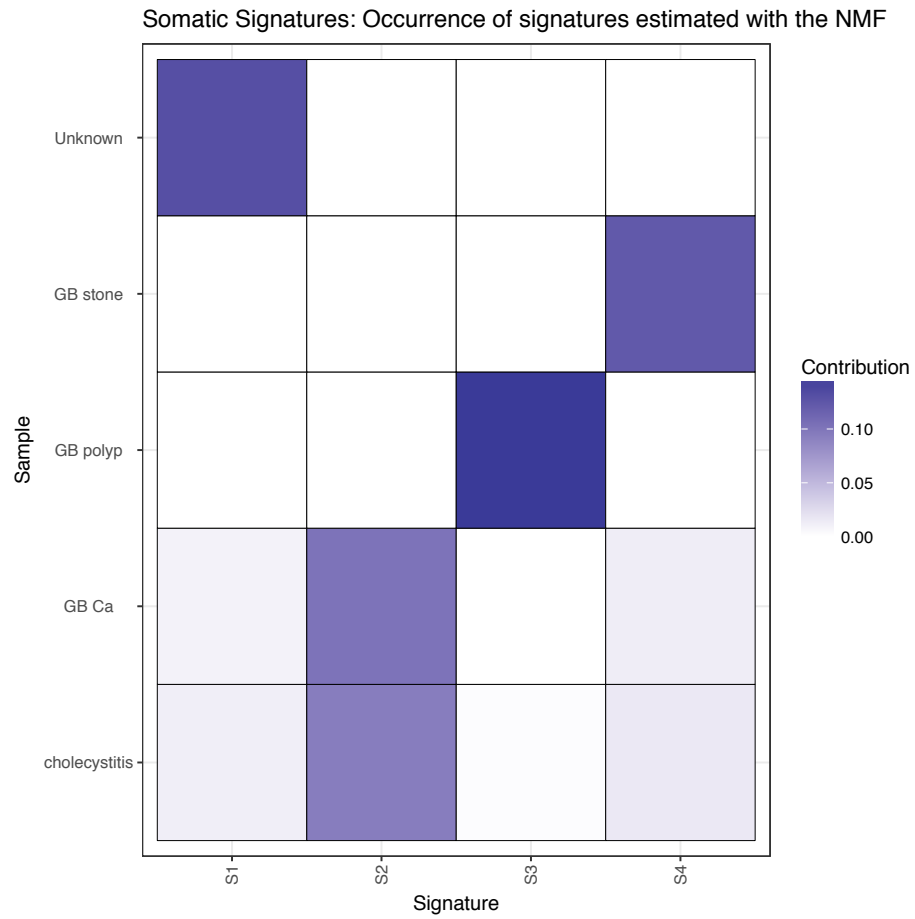**b**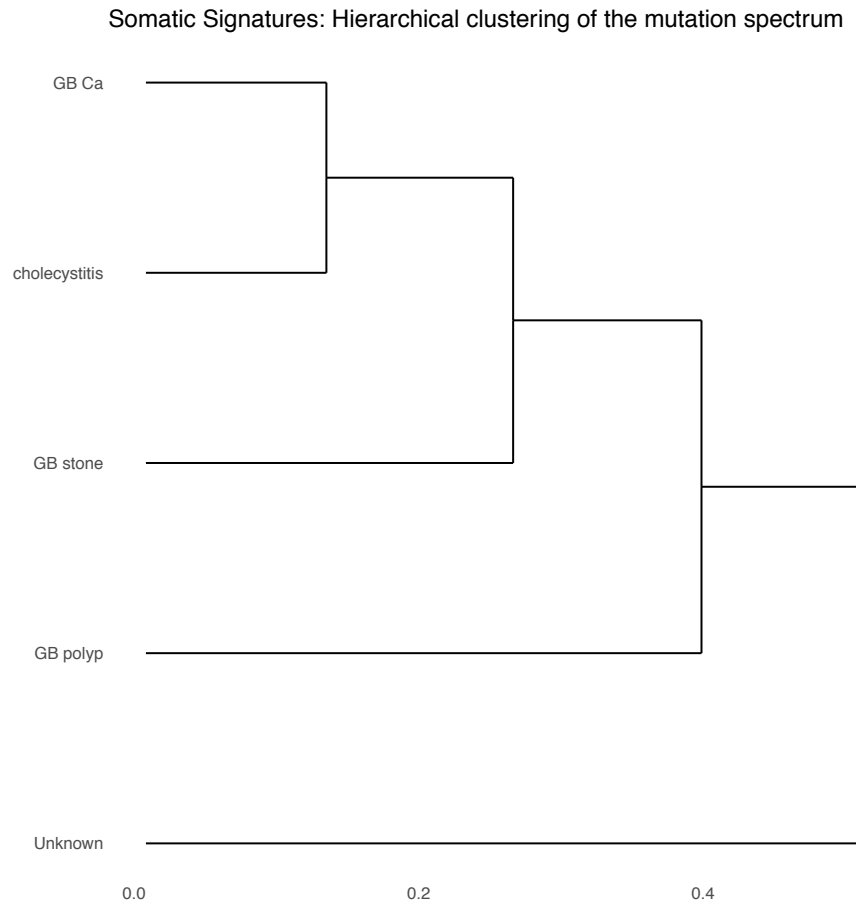

**Supplementary Fig. 6. a**, Somatic substitution signature-based clustering and **b**, somatic substitution-based hierarchical clustering of GBC, cholecystitis, Gall stone and polyp samples.

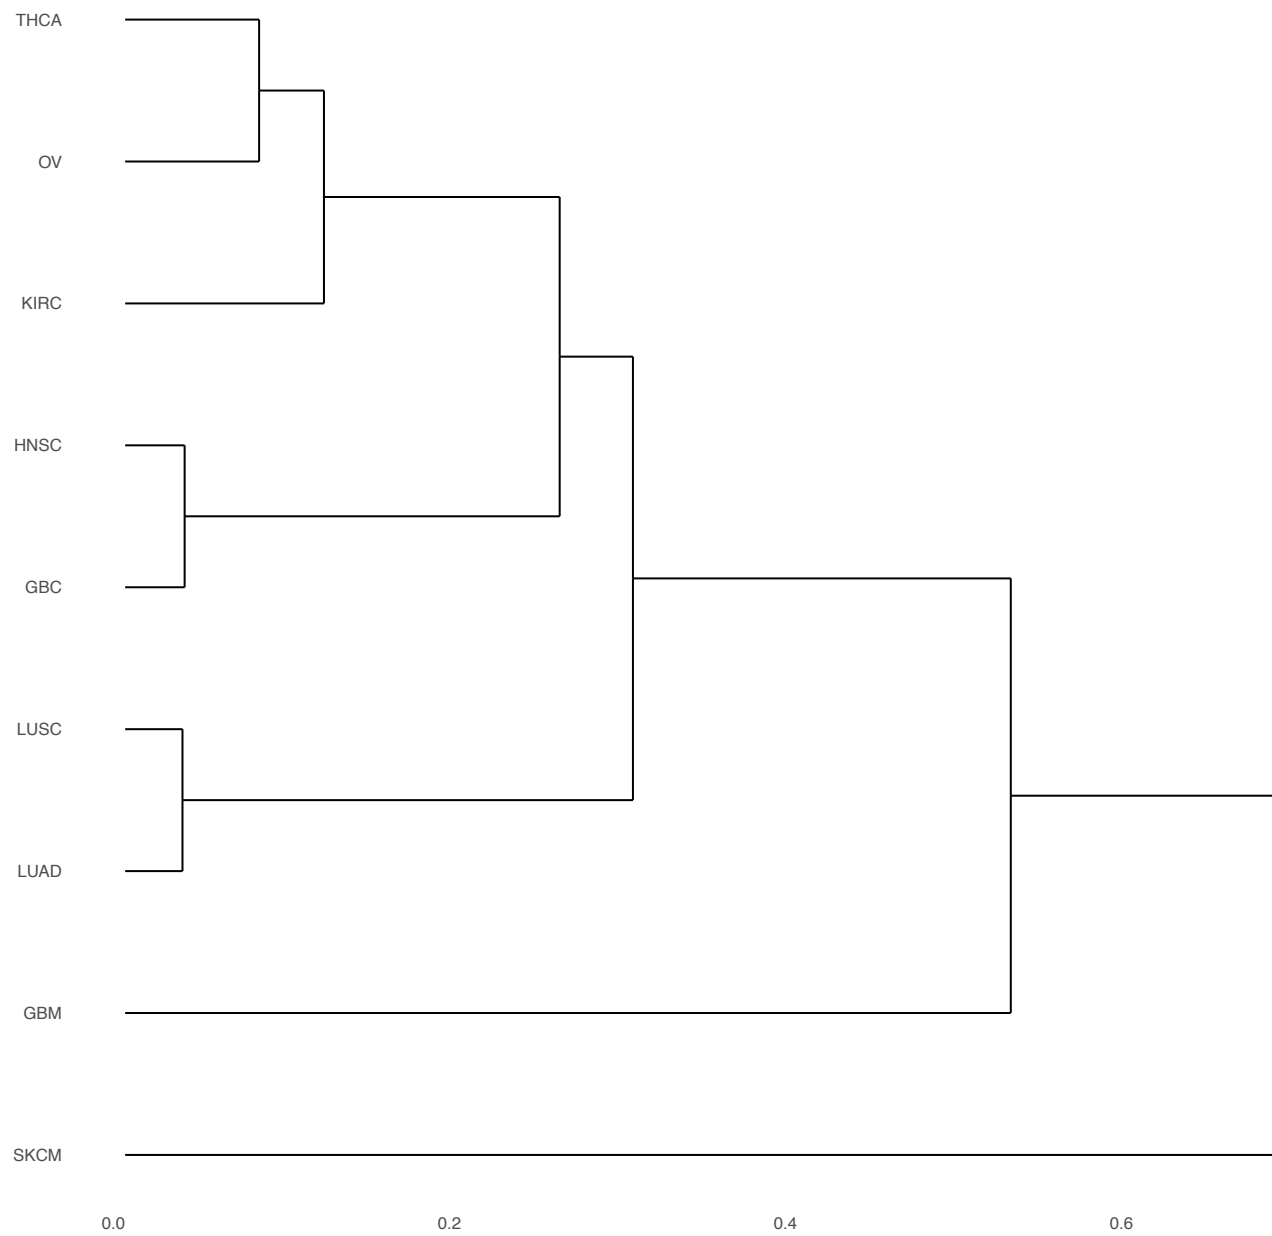

**Supplementary Fig. 7.** Somatic substitution signature-based clustering of GBC and 8 other non-GBC cancer types



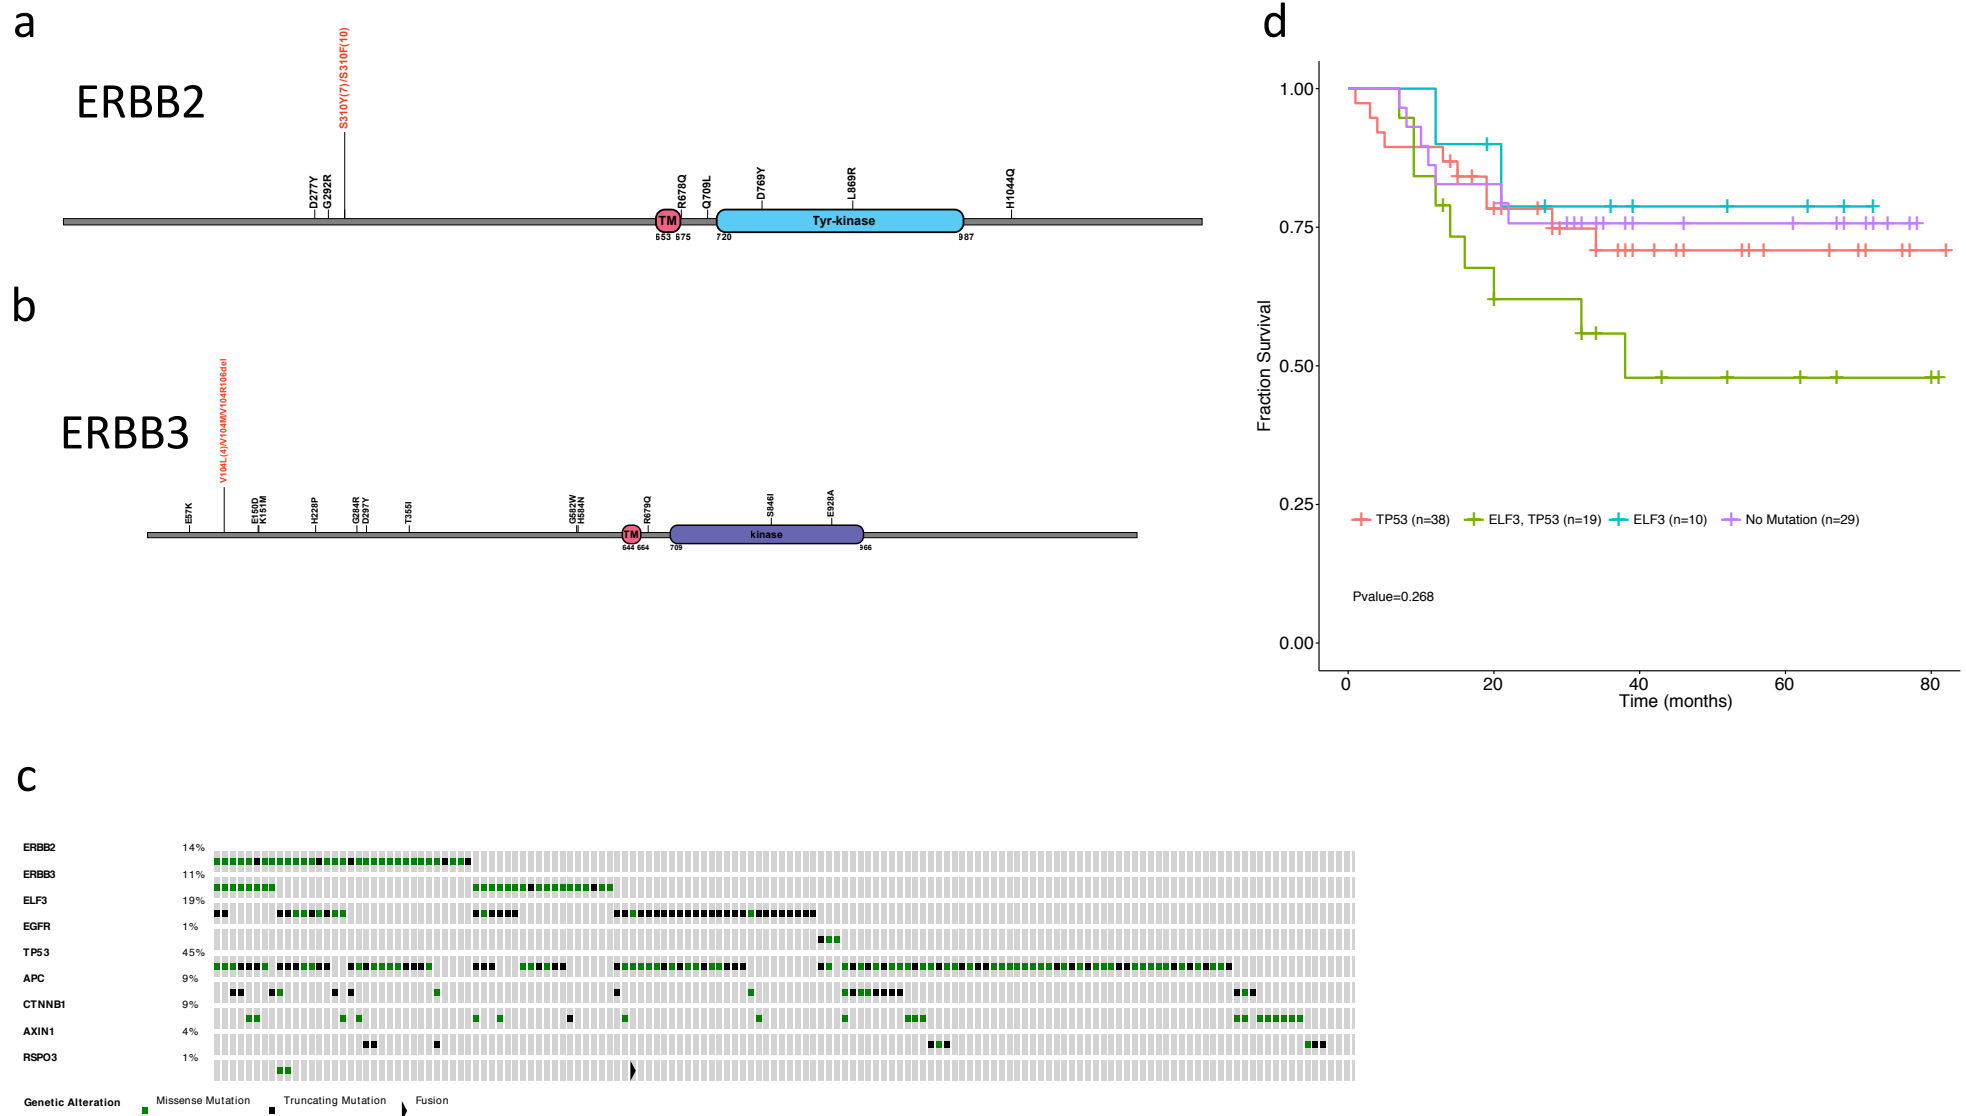

**Supplementary Fig. 8. a-b**, Protein altering mutation observed in (a) ERBB2 and (b) ERBB3 mutations. **c**, Quilt plot representing mutations in select indicated genes. Each column represents a sample. **d**, Kaplan-meier survival plot stratified by samples containing TP53 mutations, containing both TP53 and ELF3 mutations, containing ELF3 mutations and containing neither TP53 or ELF3 mutations. Log-rank test  $p$ -values are presented for each group

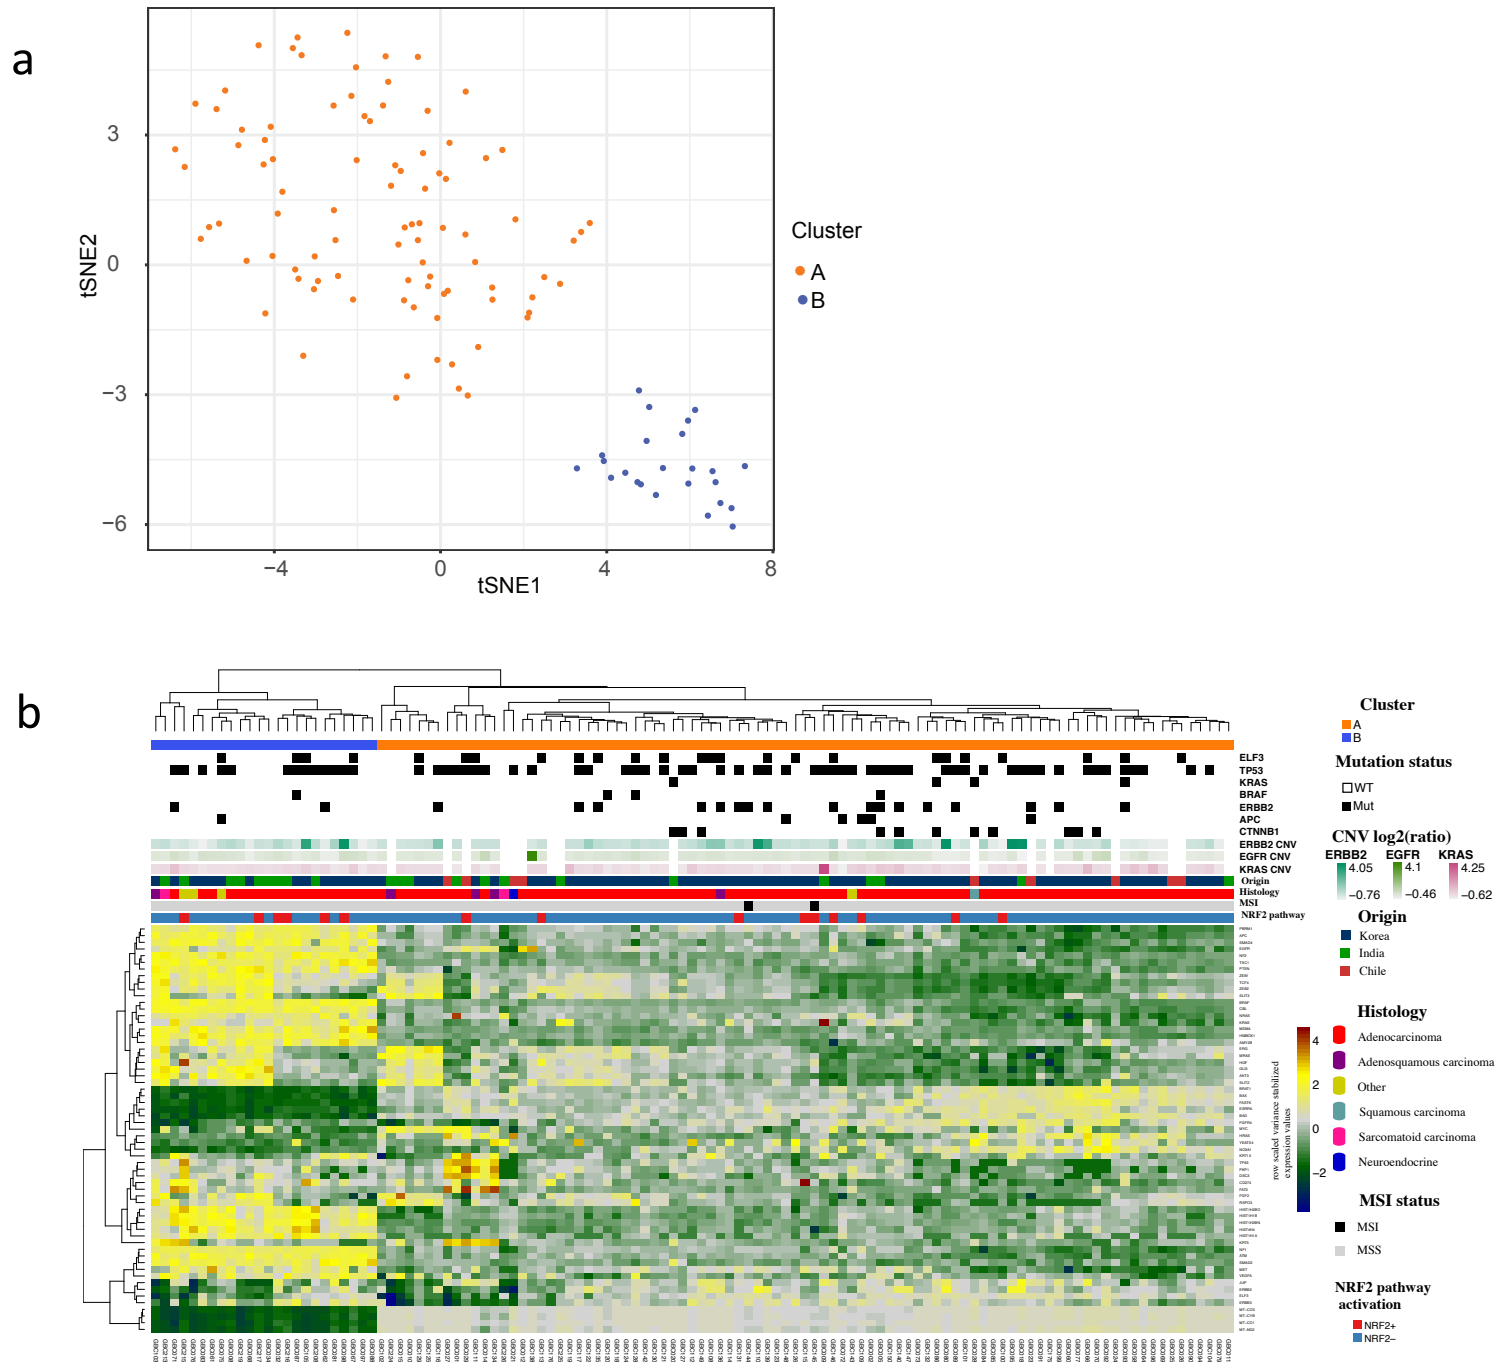

**Supplementary Fig. 9. a**, tSNE analysis of GBC RNA-seq samples **b**, Unsupervised hierarchical clustering of the top 400 most variable genes.

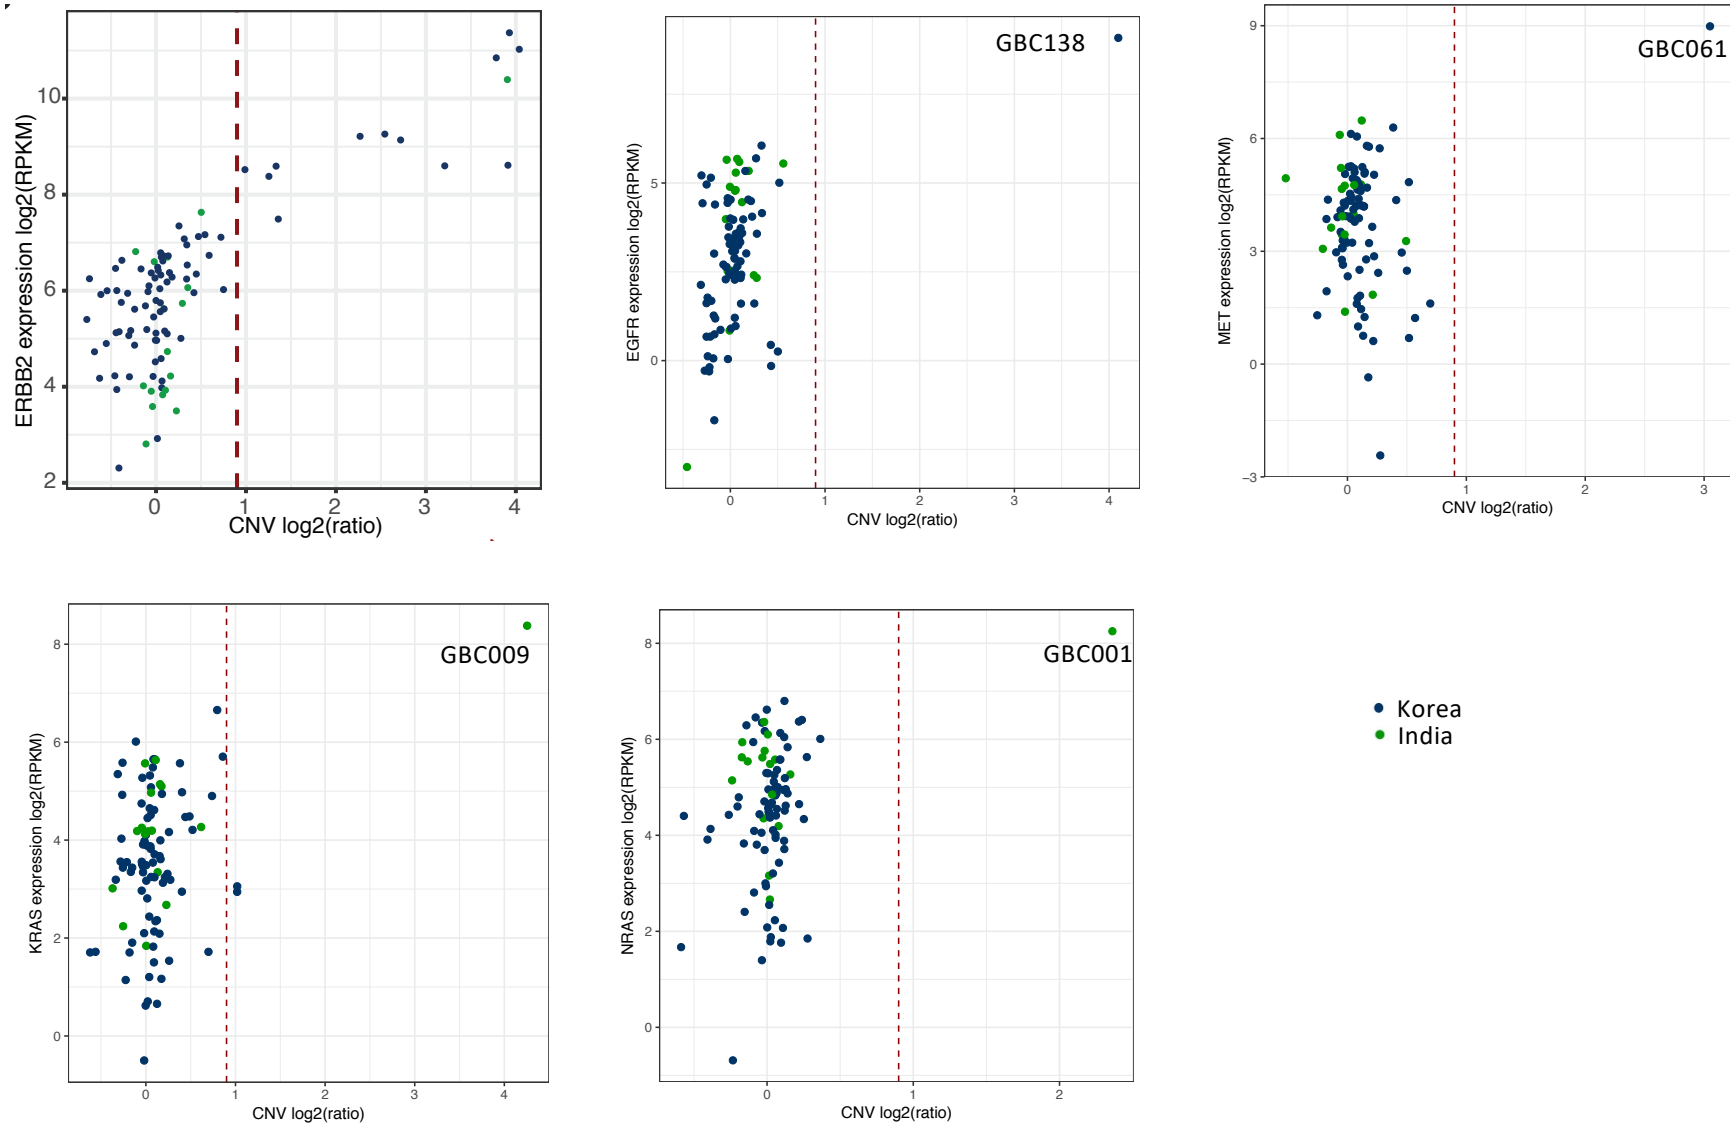

**Supplementary Fig. 10.** Gene expression vs gene copy-number ratio of indicated amplified genes. The panel showing ERBB2 expression show in main Fig 8 is reproduced here for convenience.

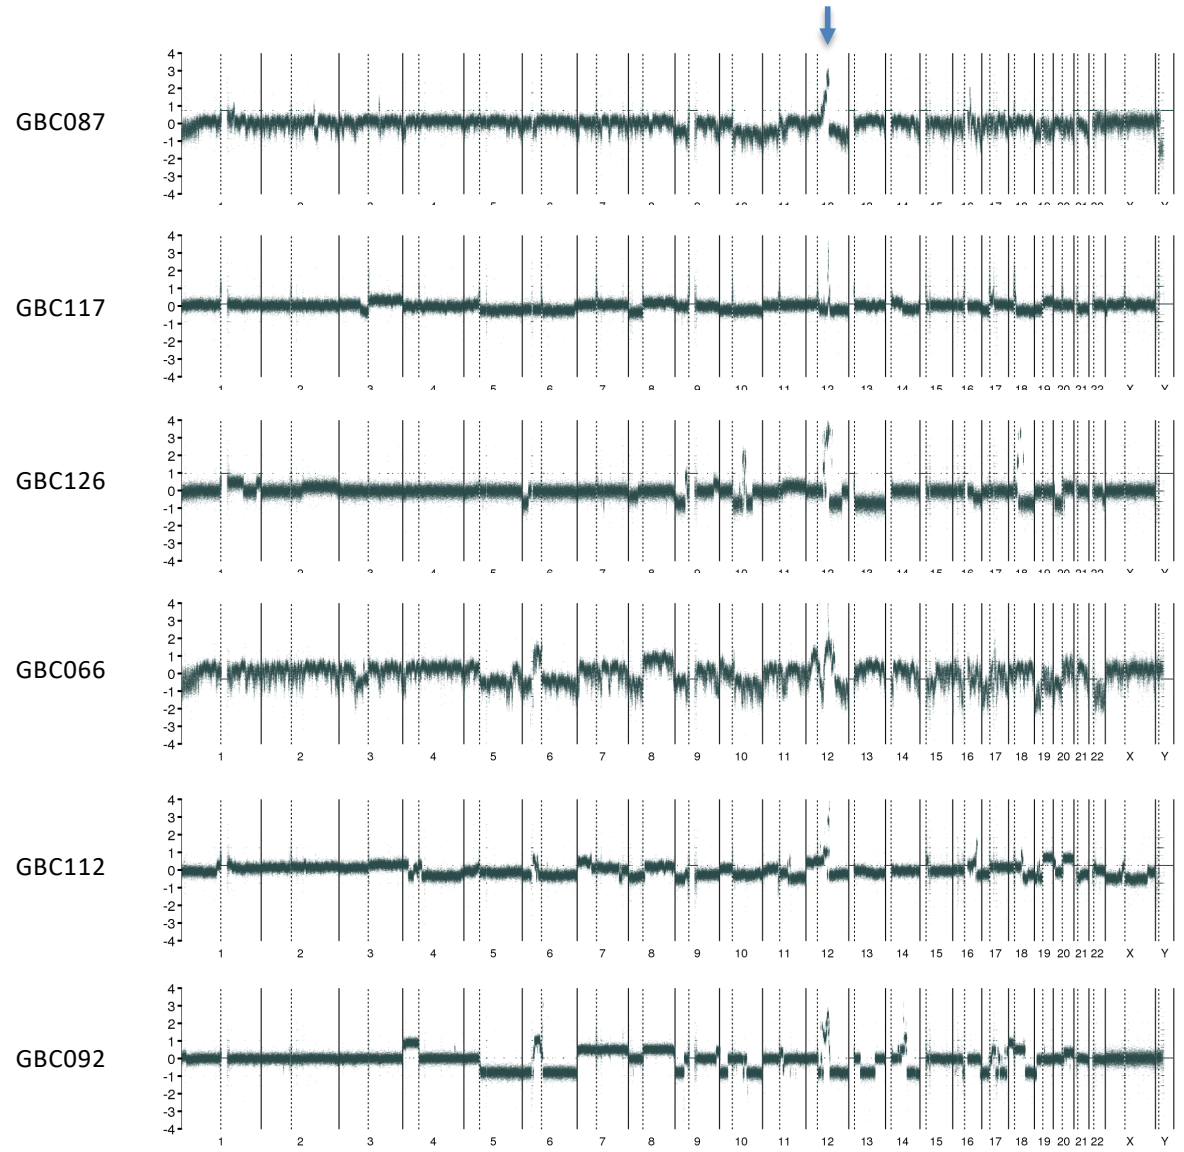

**Supplementary Fig. 11:** Genome wide copy number plot showing distinct chromosome 12 amplicon present in 6 samples.

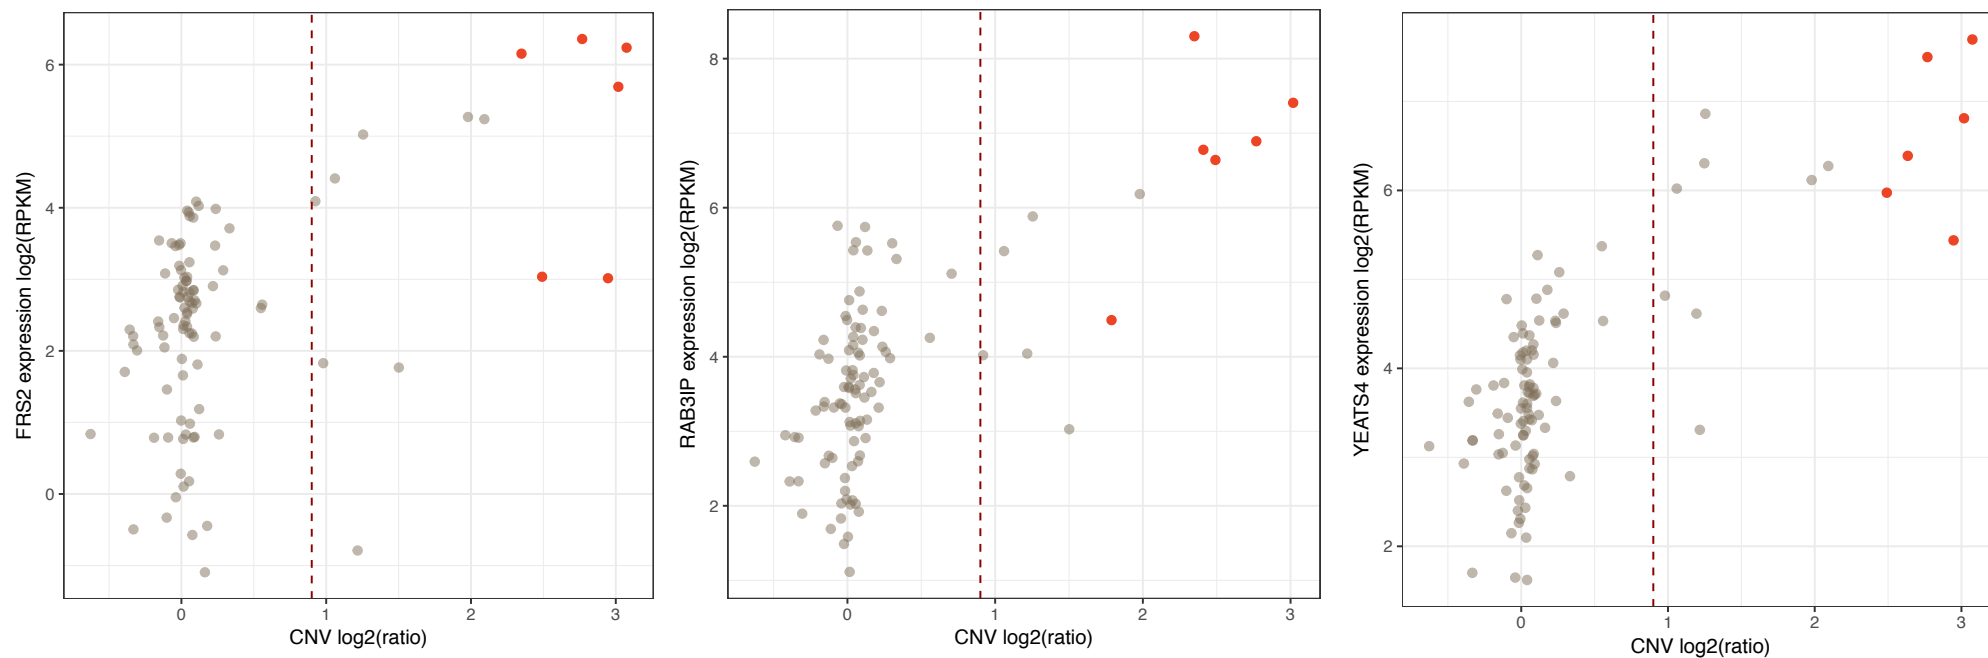

● Sample with chr12 amplicon

**Supplementary Fig. 12:** Gene expression vs gene copy-number ratio of FRS2, RAB3IP and YEATS4, located in the amplified region in chromosome 12.

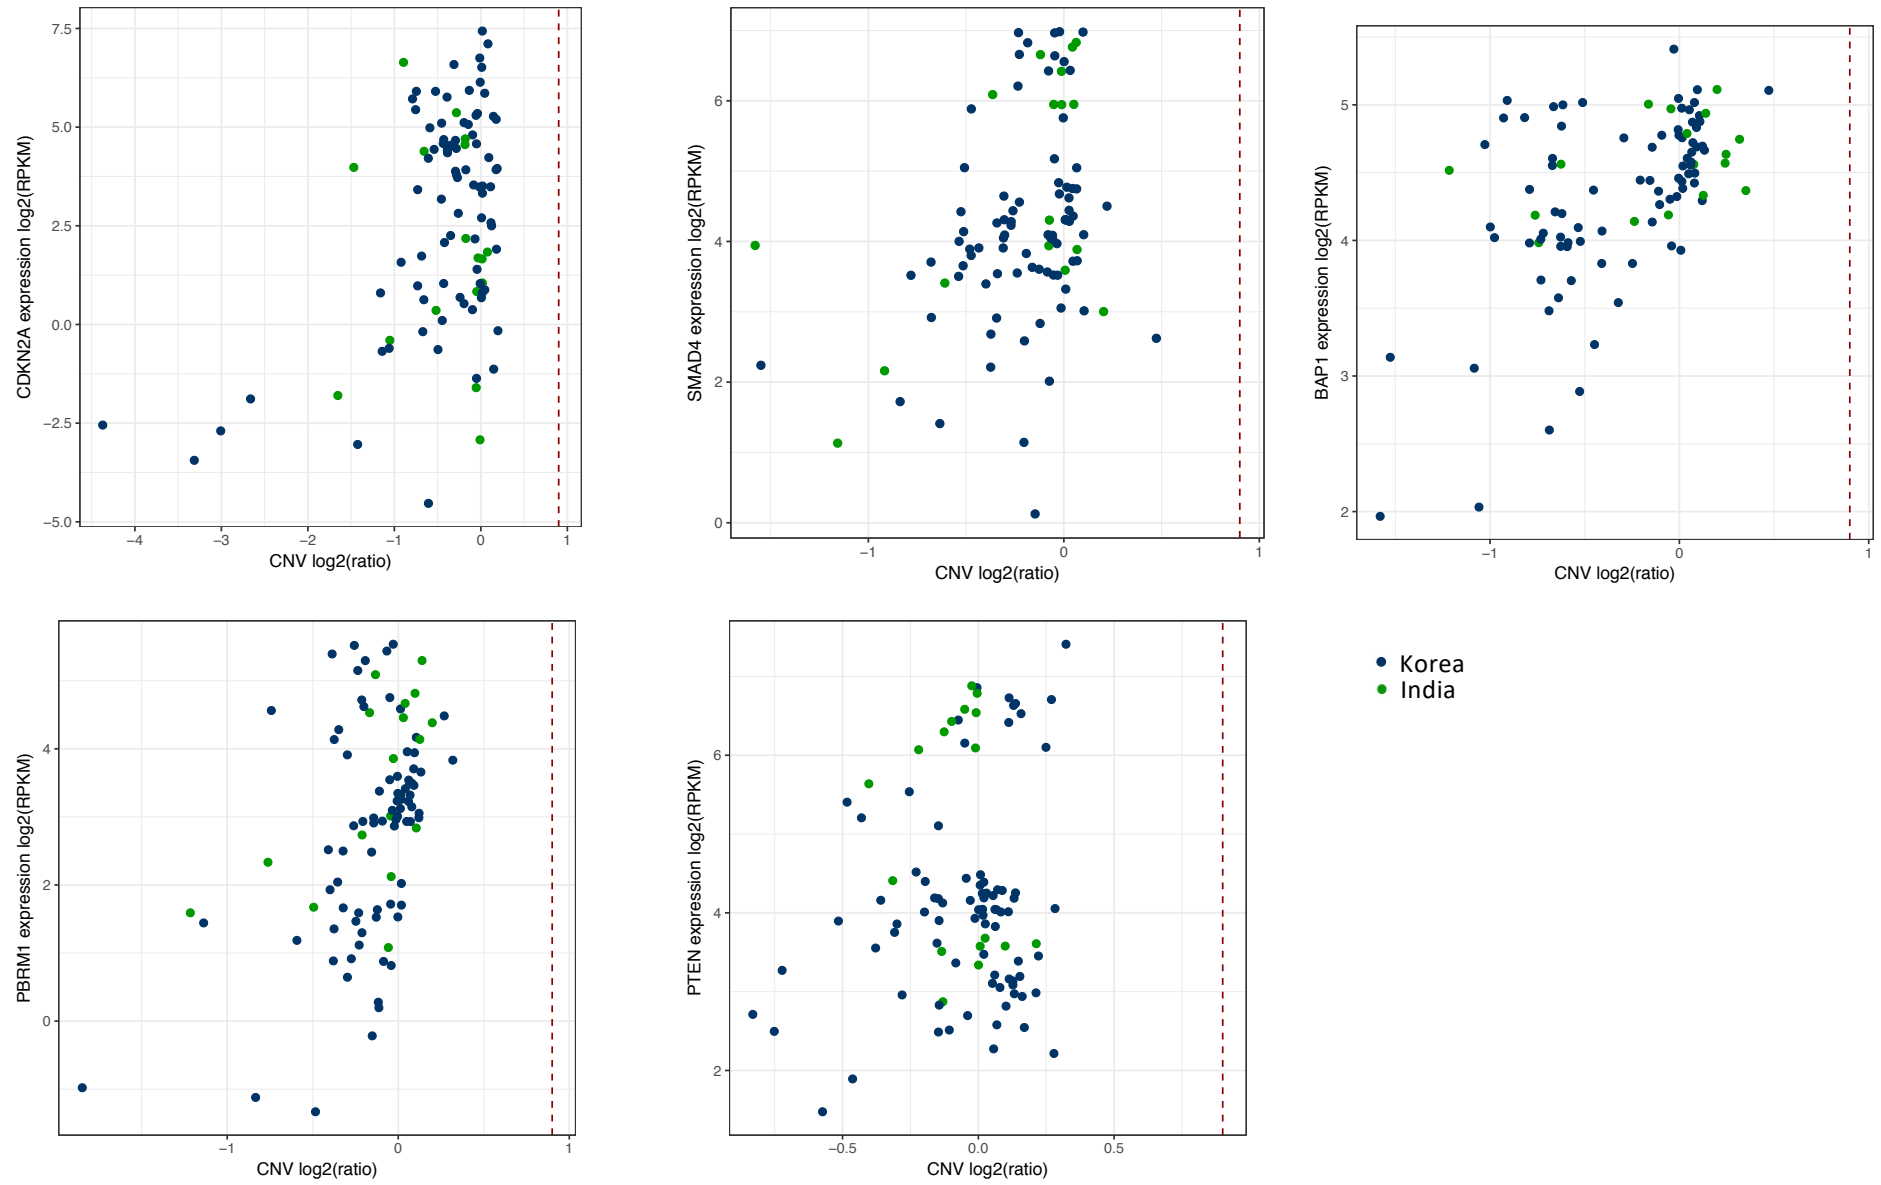

**Supplementary Fig. 13:** Gene expression vs gene copy number ratio for deleted genes.

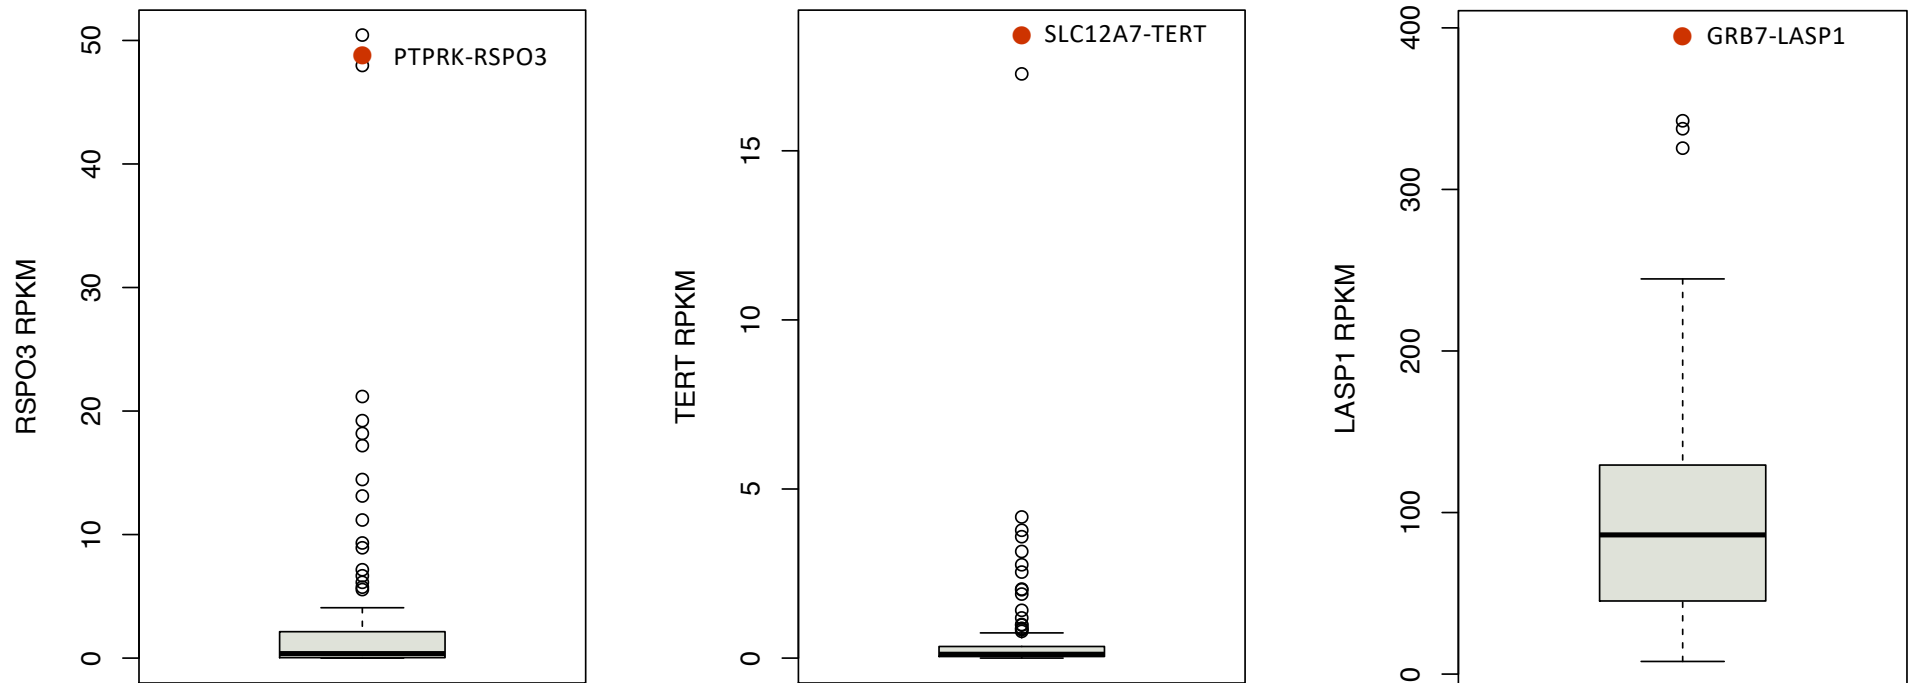

**Supplementary Fig. 14:** Boxplot of expression levels (RPKM) of select genes involved in gene fusions. Expression values for samples with gene fusion are indicated by a solid red circle. Boxes indicate the interquartile range (IQR); center line, median; whiskers, lowest and highest values within 1.5x IQR from the first and third quartiles, respectively. PTPRK-RSPO3 (n=115) , SLC12A7-TERT (n=115) and GRB-LASP1 (n=115)

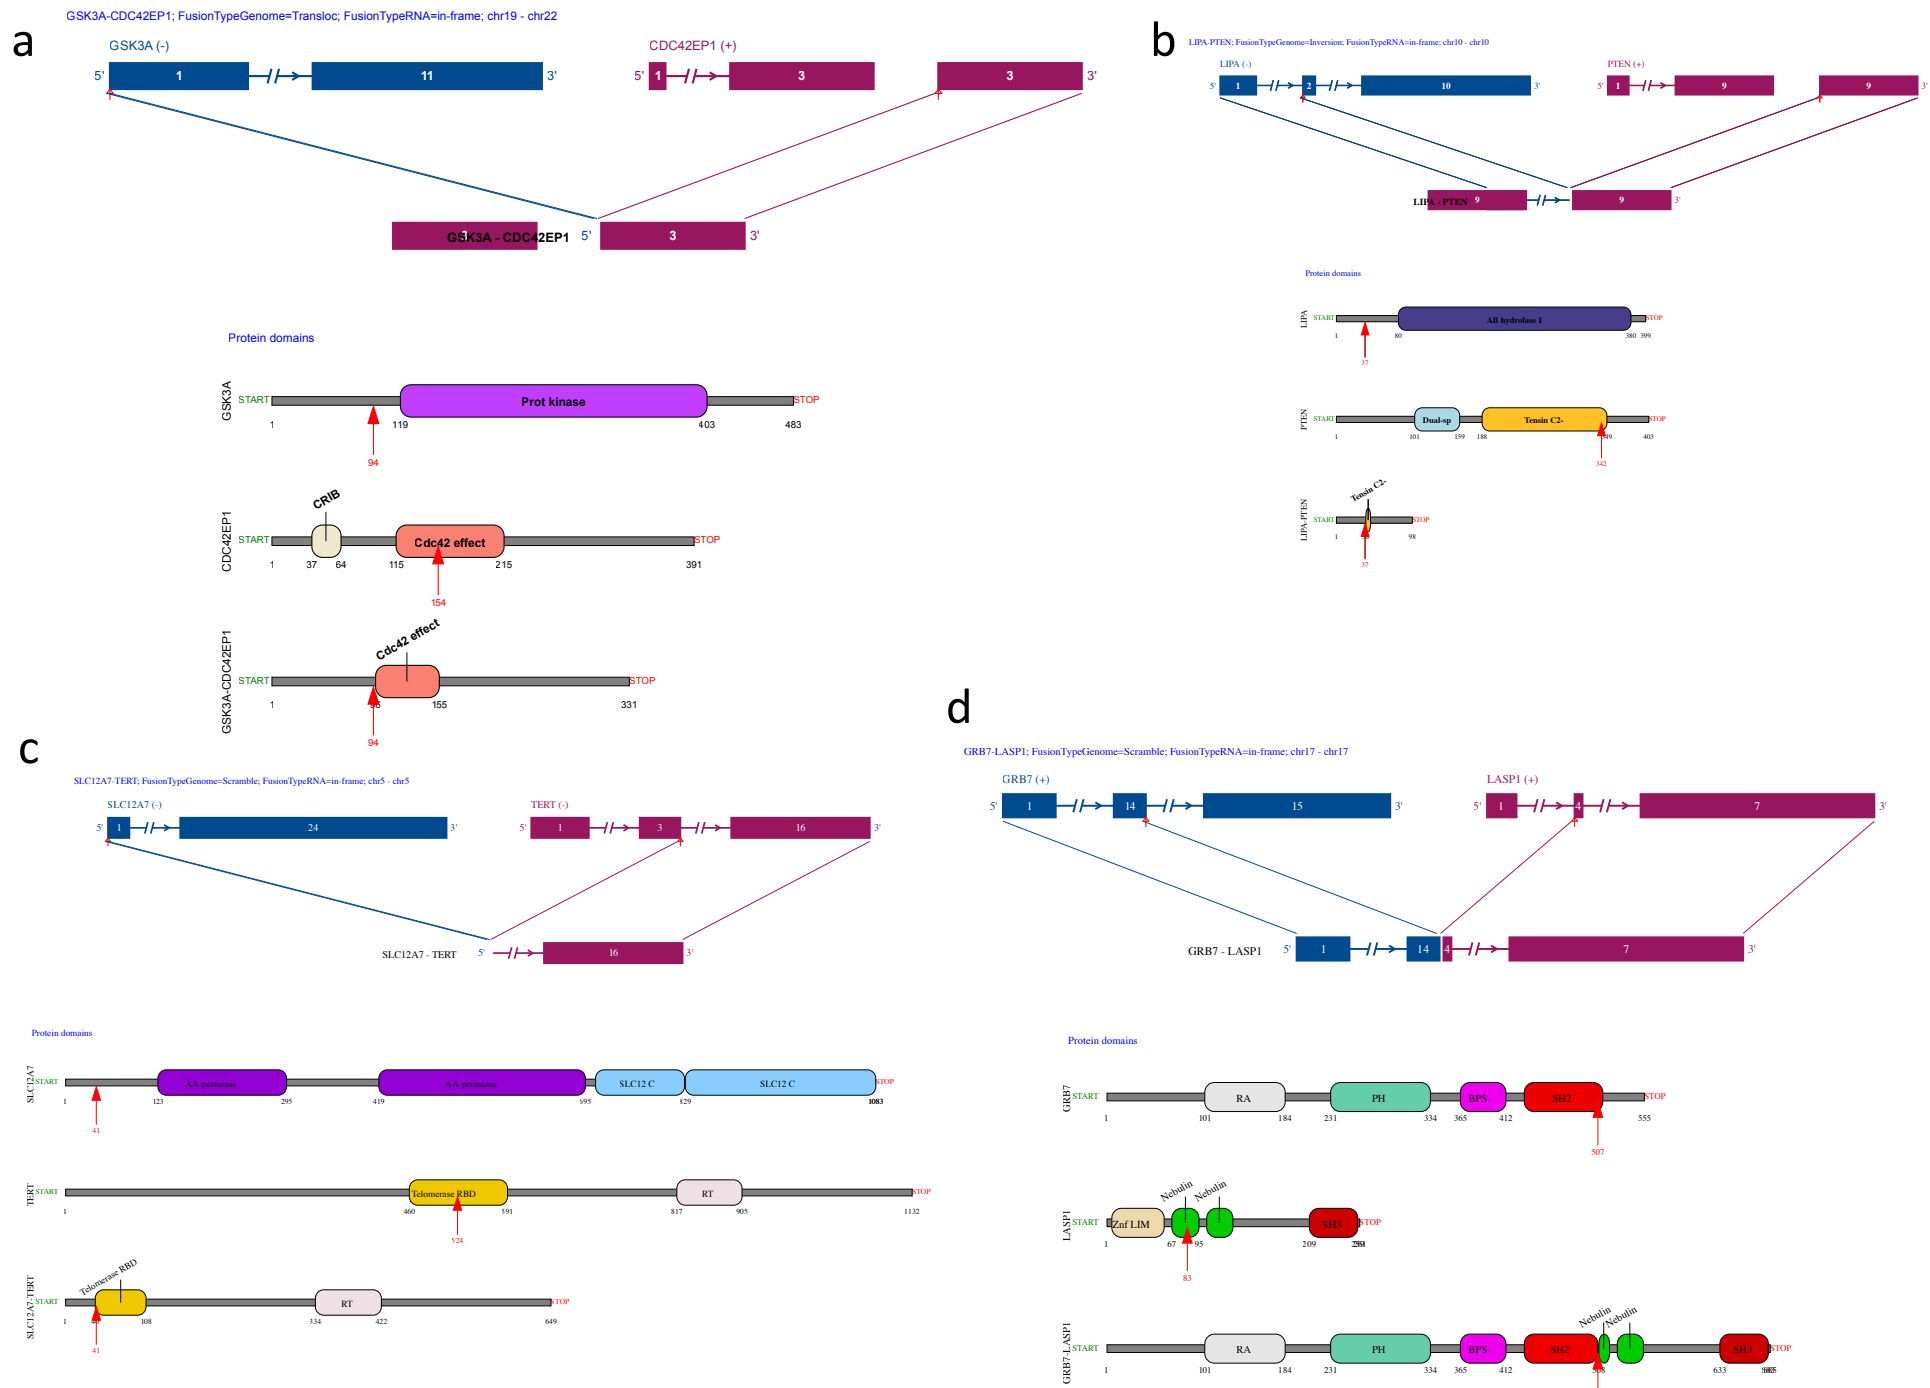

**Supplementary Fig. 15.** a-d, Schematic representation of gene fusions GSK3A- CDC42EP1 (a), LIPA-PTEN (b), SLC12A7-TERT (c) and GRB7-LASP1 (d)



a

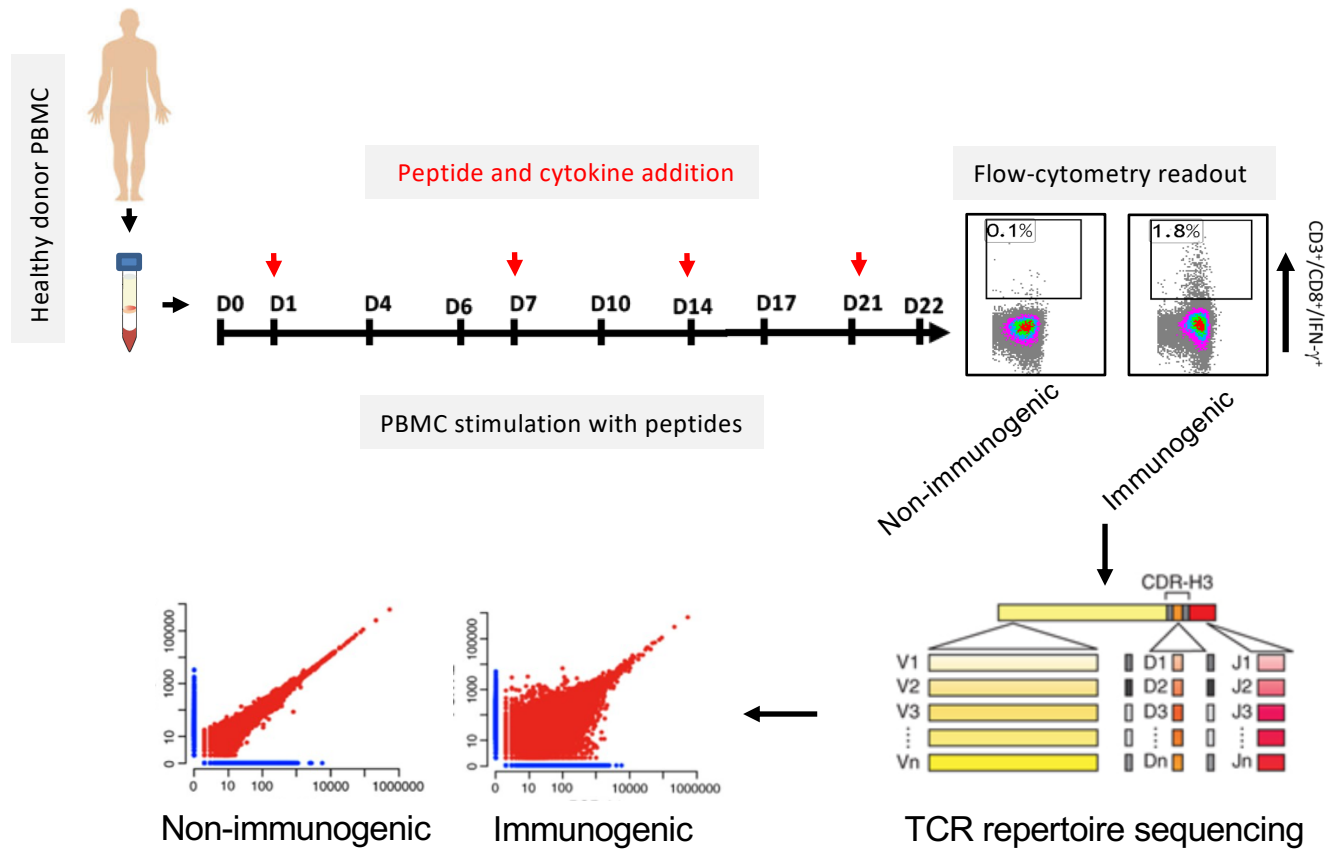

b

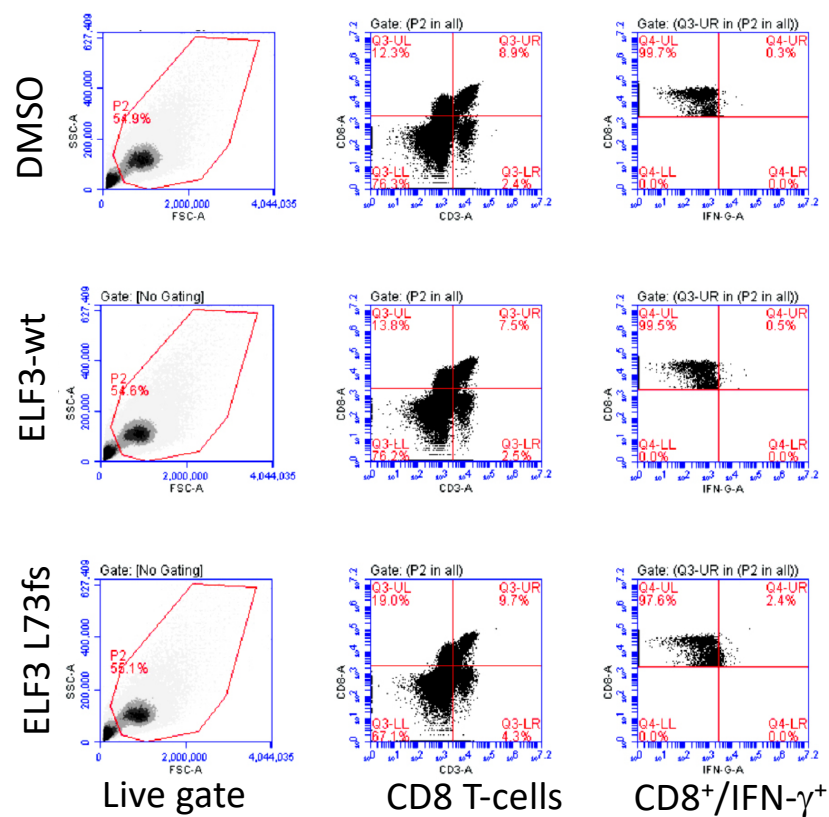

**Supplementary Fig. 16. a**, Workflow to assess the immunogenicity of the neo-antigen peptides using healthy donor PBMCs. **b**, Gating strategy to identify CD8<sup>+</sup>/IFN-g<sup>+</sup> T-cells. Live cells  $\rightarrow$  CD3<sup>+</sup>/CD8<sup>+</sup>  $\rightarrow$  T-cells CD8 T-cells that are also positive for IFN-g. The same gating strategy was used for identifying activated T-cells in all assays.

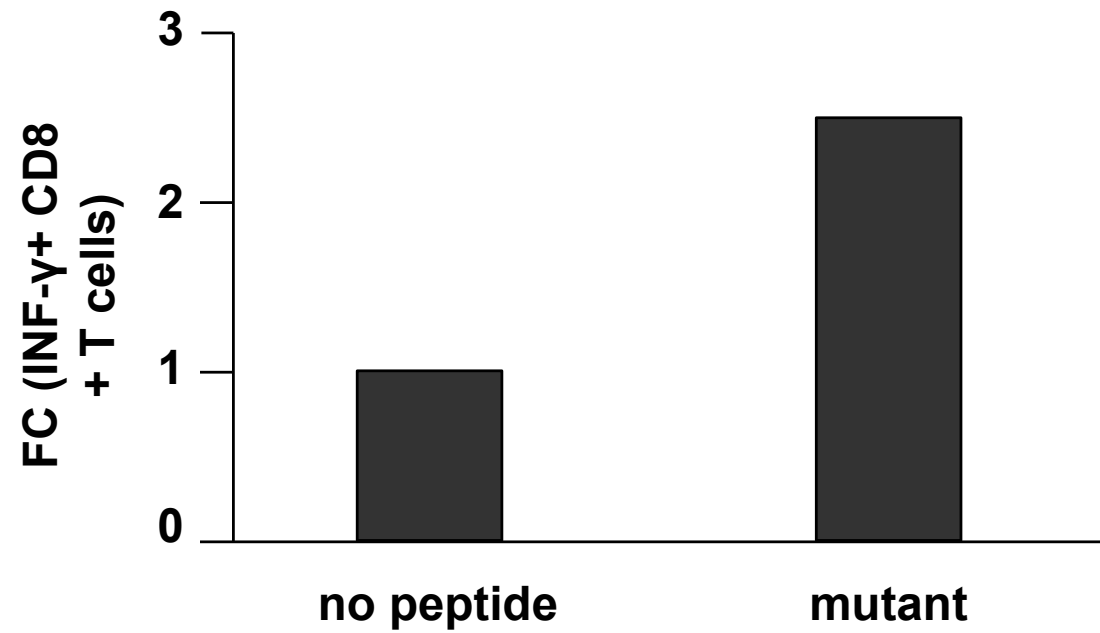

**Supplementary Fig. 17.** Activation of CD8<sup>+</sup> T-cells by TP53 neoantigen peptide measured by INF $\gamma$  secretion (n=1).

**a**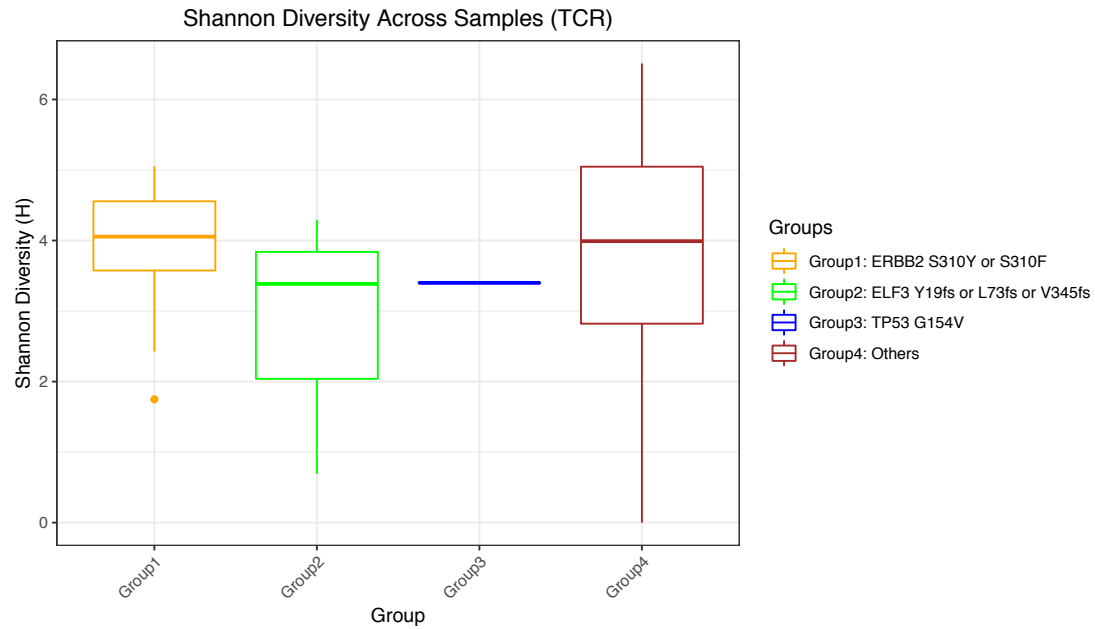**b**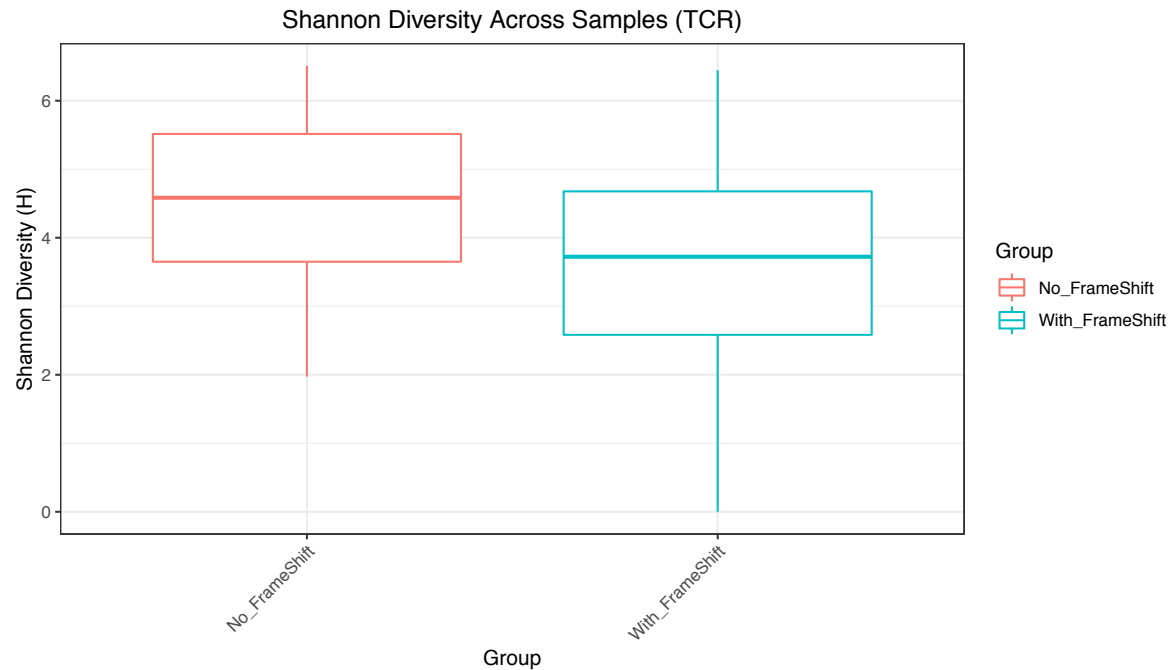

**Supplementary Fig. 18.** TCR diversity of clonotypes. a, between different neoantigen profile groups (Group1, n =951; Group 2, n=122; Group3, n =39; Group 4, n=13,876) and b, samples with and without frameshift mutations (n=5,591 and 9,413, respectively). Boxes indicate IQR; center line, median; whiskers, lowest and highest values within 1.5x IQR from the first and third quartiles, respectively

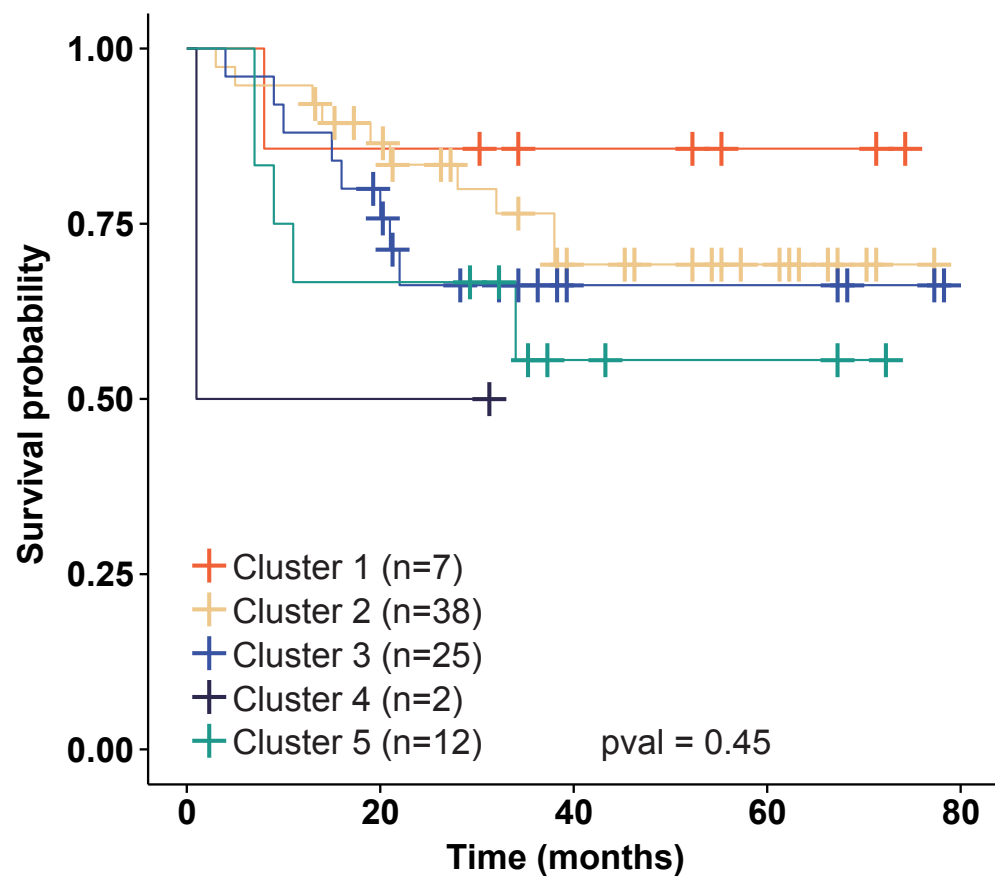

Supplementary Fig. 19. a, PDL-1 expression. b, Kaplan-Meier survival plot of samples stratified by clusters identified using xCell<sup>2</sup>.

## Actionable Alterations in ERBB2/3, PIK3CA, BRAF

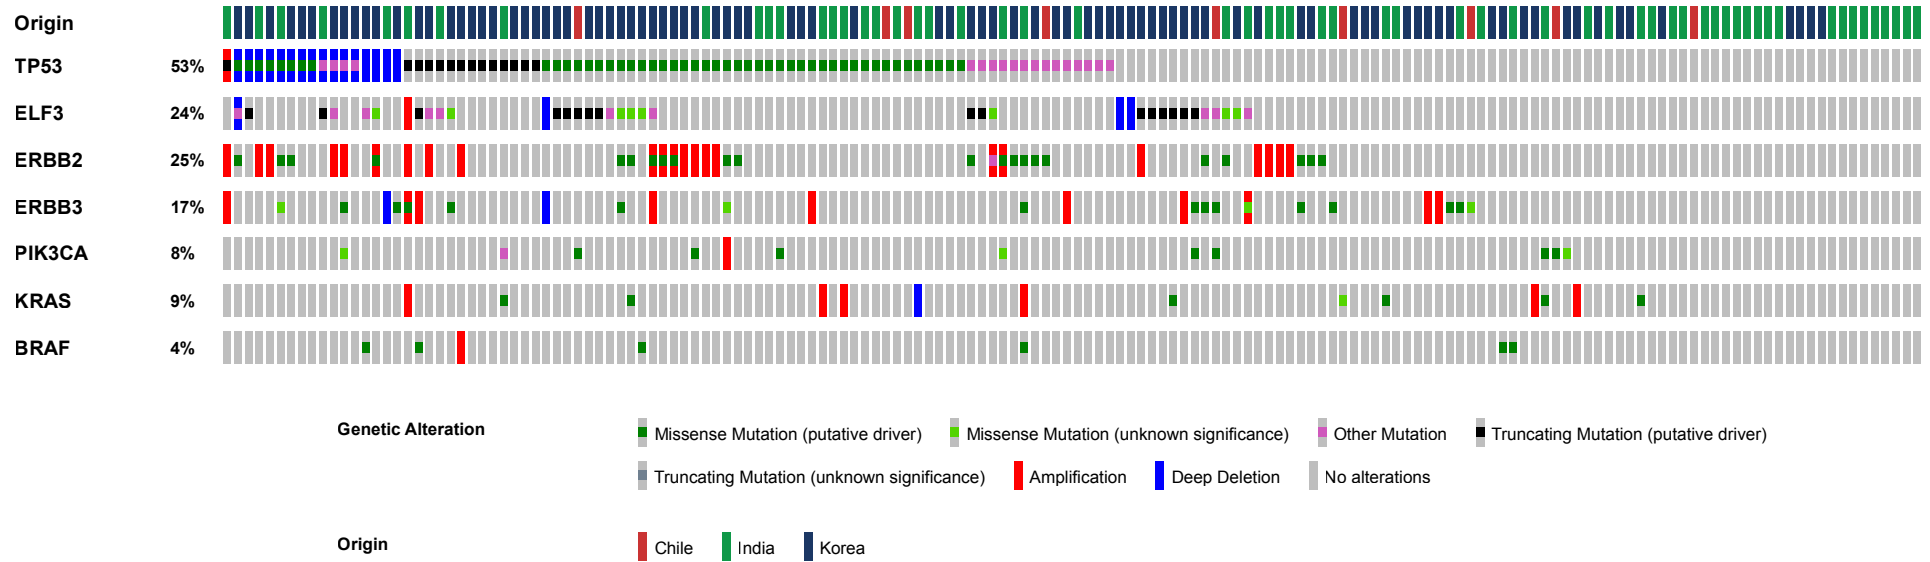

Supplementary Fig. 20. Actionable alterations in GBC.

## **Supplementary Tables**

**Supplementary Table 1 - Sample summary**

**Supplementary Table 2 - Significantly mutated GBC genes**

**Supplementary Table 3 - Gene fusions**

**Supplementary Table 4 - Actionable alterations in GBCs**

Supplementary Table 1 - Sample Summary

|               | GBC (n=167) |       |       |       | Cholecystitis* (n=23) |       |       |       | Polyp (n=2) |       | Stone* (n=14) |       | Cell line (n=7) |       | All Total |
|---------------|-------------|-------|-------|-------|-----------------------|-------|-------|-------|-------------|-------|---------------|-------|-----------------|-------|-----------|
|               | India       | Korea | Chile | Total | India                 | Korea | Chile | Total | Korea       | Total | Korea         | Total | Korea/Japan     | Total |           |
| Total samples | 64          | 94    | 9     | 167   | 19                    | 3     | 1     | 23    | 2           | 2     | 14            | 14    | 7               | 7     | 213       |
| WES           | 60          | 91    | 9     | 160   | 19                    | 3     | 1     | 23    | 2           | 2     | 14            | 14    | 7               | 7     | 206       |
| RNA-seq       | 22          | 84    | 9     | 115   | -                     | -     | -     | -     | -           | -     | -             | -     | 5               | 5     | 120       |
| WGS (~5x)     | 54          | 92    | -     | 146   | 12                    | 3     | -     | 15    | 2           | 2     | 14            | 14    | 7               | 7     | 184       |



**Supplementary Table 2 - Significantly mutated GBC genes**

| Gene   | P-value* | False Discovery Rate (FDR)* | # of SNVs | # of Indels | Total # of Mutants | Total # of Samples | Mutation (count)                                                                                                                                                                                                                                                                                                                                                                                                                                                                                                                                                                                                                                                                                                                                                                                                                                                                                                                                                                                                                                                                                                                                                                                                                                                                                                                                                                                                                                                                                                                                                                                                                                                                                                                                                                                                                                                                                                                                                                                                                                                                                                                                                                                                                                                                                                                                                                                                                                                                                                                                                                                                                                                                                                                                                                                                                                                                                                                                                                                                                                                                                                                                                                                                                                                                                                                                                                                                                                                                                                                                                                                                                                                                                                                                                                                                                                                              |
|--------|----------|-----------------------------|-----------|-------------|--------------------|--------------------|-------------------------------------------------------------------------------------------------------------------------------------------------------------------------------------------------------------------------------------------------------------------------------------------------------------------------------------------------------------------------------------------------------------------------------------------------------------------------------------------------------------------------------------------------------------------------------------------------------------------------------------------------------------------------------------------------------------------------------------------------------------------------------------------------------------------------------------------------------------------------------------------------------------------------------------------------------------------------------------------------------------------------------------------------------------------------------------------------------------------------------------------------------------------------------------------------------------------------------------------------------------------------------------------------------------------------------------------------------------------------------------------------------------------------------------------------------------------------------------------------------------------------------------------------------------------------------------------------------------------------------------------------------------------------------------------------------------------------------------------------------------------------------------------------------------------------------------------------------------------------------------------------------------------------------------------------------------------------------------------------------------------------------------------------------------------------------------------------------------------------------------------------------------------------------------------------------------------------------------------------------------------------------------------------------------------------------------------------------------------------------------------------------------------------------------------------------------------------------------------------------------------------------------------------------------------------------------------------------------------------------------------------------------------------------------------------------------------------------------------------------------------------------------------------------------------------------------------------------------------------------------------------------------------------------------------------------------------------------------------------------------------------------------------------------------------------------------------------------------------------------------------------------------------------------------------------------------------------------------------------------------------------------------------------------------------------------------------------------------------------------------------------------------------------------------------------------------------------------------------------------------------------------------------------------------------------------------------------------------------------------------------------------------------------------------------------------------------------------------------------------------------------------------------------------------------------------------------------------------------------------|
| CTNNB1 | 0        | 0                           | 18        | 1           | 19                 |                    | D32Y(1), S37C(3), S37F(2), T41A(5), S45S47del(1), S45P(1),<br>19 S45A(1), S45F(2), S45C(1), K335I(1), L452R(1)                                                                                                                                                                                                                                                                                                                                                                                                                                                                                                                                                                                                                                                                                                                                                                                                                                                                                                                                                                                                                                                                                                                                                                                                                                                                                                                                                                                                                                                                                                                                                                                                                                                                                                                                                                                                                                                                                                                                                                                                                                                                                                                                                                                                                                                                                                                                                                                                                                                                                                                                                                                                                                                                                                                                                                                                                                                                                                                                                                                                                                                                                                                                                                                                                                                                                                                                                                                                                                                                                                                                                                                                                                                                                                                                                                |
| ELF3   | 0        | 0                           | 15        | 22          | 37                 |                    | Y19fs(1), K56fs(2), L73fs(1), I76fs(1), Y85*(1), splice(4), W138C(1),<br>Q174fs(1), R205fs(1), S207fs(1), G238fs(1), E277fs(1), L283H(1),<br>G301fs(1), L306R(1), W315*(1), K319K320del(1), K320fs(2),<br>N321fs(3), M324fs(1), M324I(1), Y326*(1), E327Q(1), Y336fs(1),<br>34 K338L342del(1), V345fs(1), D346N(1), F354L(1), G355D(1), W361*(1)<br>*394fs(1), Q375*(1), L344P(1), R342*(1), F341C(1), F338C(1),<br>Q331*(2), L308fs(1), splice(4), R306*(1), E286K(1), R282W(1),<br>D281G(1), R280K(4), R280I(1), C277fs(1), R273H(1), R273C(2),<br>S269fs(1), S269N(1), I254T(1), T253A(1), R248Q(1), G245D(1),<br>G245S(1), S241Y(1), S241C(2), C238Y(1), Y234C(1), S227fs(1),<br>Y220C(1), T211H214del(1), R213Q(2), F212fs(1), R209fs(1),<br>D208V(1), L206*(1), Y205H(1), I195N(1), L194R(2), H193R(1),<br>Q192*(2), P177C182del(1), R181C(1), H178fs(1), P177R(1),<br>C176*(1), R175H(7), R175G(1), V173L(1), V173M(2), Y163H(1),<br>I162N(1), R158A159dup(1), V157D(1), G154V(1), V147fs(1),<br>P151S(1), S149fs(1), L145R(1), L137fs(1), N131del(1), S127T(1),<br>TP53 80 W91*(1), A76fs(1), E62fs(1), I50fs(1), E51*(1), P34fs(1), P27fs(1)<br>D277Y(1), D277A(1), E286K(1), G292R(1), S310F(6), S310Y(7),<br>R678Q(1), Q709L(1), D769Y(1), V777L(1), I788V(1), V842I(3),<br>ERBB2 23 L869R(1), H1044Q(1), D1058G(1)<br>T56fs(1), E282K(1), L381fs(1), S417*(1), P471fs(1), S501P(1),<br>Q526*(1), G638R(1), V757E(1), Q760*(1), S832*(1), S833fs(1),<br>S833C(1), I848fs(1), Q871*(1), Q923*(1), Q995*(1), Q1221*(1),<br>R1272*(1), S1351fs(1), Q1403*(2), S1489*(1), P1582fs(1),<br>ARID2 21 Q1711*(1), S1748*(1), D1830fs(1)<br>E57K(1), M91I(1), V104M(2), V104L(4), E150D(1), K151M(1),<br>H228P(1), A232V(1), G284R(1), D297Y(1), T355A(1), T355I(1),<br>ERBB3 17 Y464H(1), G582W(1), H584N(1), S846I(1), E928A(1), R1314H(1)<br>E133*(1), W124*(1), D122H(1), D122N(1), L111P(1), H97Y(1),<br>CDKN2A 13 P94L(2), R88Q(1), G83V(1), P72L(1), splice(1), W34fs(1)<br>K41fs(1), Y60fs(2), K84*(1), splice(2), K175fs(1), K175T(1),<br>STK11 10 P179R(1), Q220*(1), W332*(1)<br>R38fs(1), D52fs(1), L57V(1), R135*(1), E330K(1), D355V(1),<br>R361C(1), R361H(1), Q366*(1), R380M(1), splice(1), R445*(1),<br>SMAD4 12 E538*(1)<br>Y222*(1), G240fs(1), Y471*(1), Q546fs(1), Q583*(1), S607*(1),<br>V700fs(1), S1153C(1), D1850fs(1), T1892A(1), E2023fs(1),<br>ARID1A 16 D2133fs(1), R2158*(1), N2220S(1), M2267I(1), S2269fs(1)<br>T116S(1), A118fs(1), L125fs(1), M209T(1), K274fs(1), N277S(1),<br>EHF 7 R287Q(1)<br>7 M189L(1), A146V(1), G13D(1), G12A(3), G12D(1)<br>KRAS 7 K506*(1), S399F(1), D375G(1), Q141*(1), G81V(1), R34L(1),<br>NFE2L2 10 G31V(1), L30F(1), D29H(1), D27G(1)<br>I403fs(1), L377S(1), K286fs(1), E278del(1), K218fs(1), splice(1),<br>PSIP1 8 V110fs(1), S102*(1)<br>PIK3CA 11 P104T(1), L445F(1), P449I459del(1), E453K(1), L540V(1), E542K(1),<br>E545K(3), E849Q(1), H1047R(1)<br>E61fs(2), E254K(1), S297F(1), K304N(1), H415Y(1), E442K(1),<br>ZNF107 4 S690*(1), T749S(1)<br>BRAF 6 G596R(1), D594G(2), G469V(1), G466A(1), G464V(1)<br>R440*(1), K609*(1), A1197fs(1), Y1784*(1), R1830L(1), K2273*(1),<br>NF1 10 Q2340*(1), K2428fs(1), R2450*(1), F2650Y(1), E2800K(1)<br>Y90C(1), E102K(1), R140C(1), C316R(1), S348F(1), E350K(1),<br>KAT8 6 D355H(1)<br>R810M(1), S1117Y(1), Q1367*(1), T1556fs(1), M1638fs(1),<br>A1718fs(1), F1838fs(1), E1891Q(1), S1931fs(1), S2110F(1),<br>APC 11 R2237*(1), P2435A(1), E2639*(1)<br>CHRM3 6 K213fs(1), T215A(1), E259K(1), R288Q(1), E432Q(1), R568fs(2)<br>L177P(1), S478T(1), R539H(1), L670V(1), Q739*(1), A767V(1),<br>A855V(1), E946K(1), E984K(1), R1157Q(1), R1199Q(1), R1256C(1),<br>SMARCA4 11 G1296S(1), R1307W(1)<br>ACVR2A 6 F32fs(1), W159fs(1), V432fs(1), K437fs(3)<br>MAP2K4 4 R121Q(1), D300V(1), K365*(1), D397N(1)<br>HIST1H2AG 3 A11D(1), L64P(1), E122K(1) |

\* p-value and FDR for significantly mutated genes were obtained using MuSiC<sup>3</sup>

**Supplementary Table 3 - Gene fusions**

| Sample ID  | Gene 5'  | Gene 3'  | Sample RNA-seq Data ID | # of samples with fusion | Max Read Depth | Distance | Fusion Protein Length | Fusion Type | Fusion effect     |
|------------|----------|----------|------------------------|--------------------------|----------------|----------|-----------------------|-------------|-------------------|
| GBC009     | NDRG1    | TG       | SAM17856276            | 1                        | 198            | 127356   | 277                   | Inversion   | in-frame          |
| GBC110     | GRB7     | LASP1    | SAM24296847            | 1                        | 125            | 847790   | 685                   | Scramble    | in-frame          |
| GBC079     | MPST     | CDC42EP1 | SAM24296816            | 1                        | 119            | 541262   | 391                   | Deletion    | promoter          |
| GBC009     | TSPAN15  | HK1      | SAM17856276            | 1                        | 98             | 141388   | 1015 928              | Scramble    | in-frame          |
| GBC128     | PTPRK    | RSPO3    | SAM24296866            | 1                        | 59             | 1035784  | 647                   | Inversion   | in-frame          |
| GBC009     | YY1      | EVL      | SAM17856276            | 1                        | 35             | 190071   | 301 695               | Scramble    | in-frame          |
| GBC009     | TLE3     | RACGAP1  | SAM17856276            | 1                        | 33             | -        | 632                   | Transloc    | promoter          |
| GBC009     | ASXL1    | ELF5     | SAM17856276            | 1                        | 29             | -        | 25 74                 | Transloc    | out-of-frame      |
| GBC020     | DNAJC10  | GRIK4    | SAM17856248            | 1                        | 27             | -        | 1287                  | Transloc    | in-frame          |
| GBC067     | RPTOR    | RNF213   | SAM24296803            | 1                        | 21             | 258045   | 94                    | Scramble    | out-of-frame      |
| GBC121     | SLC12A7  | TERT     | SAM24296859            | 1                        | 20             | 170756   | 649 158               | Scramble    | in-frame          |
| GBC109     | PDE6B    | TRIO     | SAM24296846            | 1                        | 20             | -        | 2021                  | Transloc    | in-frame          |
| GBC215     | HIF1A    | PRKCH    | HITS95755              | 1                        | 14             | 252728   | 80                    | Scramble    | out-of-frame      |
| GBC005     | JARID2   | GRAP2    | SAM19363402            | 1                        | 9              | -        | 330 29                | Transloc    | promoter          |
| GBC122     | ELF3     | PGBD2    | SAM24296860            | 1                        | 8              | 46901638 | 592                   | Deletion    | promoter          |
| GBC176     | RFT1     | ULK4     | SAM24296849            | 1                        | 7              | 11880764 | 70                    | Deletion    | in-frame          |
| GBC002     | SCARB1   | UBC      | SAM19363399            | 1                        | 6              | 50179    | 728                   | Scramble    | promoter          |
| GBC135, GE | GSK3A    | CDC42EP1 | SAM24296873,SAM:       | 2                        | 6              | -        | 331_331               | Transloc    | in-frame,in-frame |
| GBC081     | JUP      | ACLY     | SAM24296818            | 1                        | 6              | 102208   | 425                   | Scramble    | in-frame          |
| GBC213     | LIPA     | PTEN     | HITS95749              | 1                        | 5              | 1282251  | 98                    | Inversion   | in-frame          |
| GBC076     | B2M      | GNAS     | SAM24296813            | 1                        | 3              | -        | 370                   | Transloc    | in-frame          |
| GBC219     | PELI2    | MERTK    | HITS95731              | 1                        | 3              | -        | 375                   | Transloc    | in-frame          |
| GBC213     | RAP1GAP2 | PTEN     | HITS95749              | 1                        | 3              | -        | 375                   | Transloc    | in-frame          |

#### Supplementary Table 4. Actionable alterations in GBCs

| Sample ID | Actionable alterations                           | Drugs                                                                                                                                                                 |
|-----------|--------------------------------------------------|-----------------------------------------------------------------------------------------------------------------------------------------------------------------------|
| GBC002    | ERBB2 <sup>S310Y</sup>                           | Neratinib, Ado-Trastuzumab Emtansine                                                                                                                                  |
| GBC005    | BRAF <sup>G464V</sup> ; ERBB2 <sup>G292R</sup>   | Cobimetinib, PLX8394, Neratinib, Ado-Trastuzumab Emtansine                                                                                                            |
| GBC018    | ERBB2 <sup>AMP</sup>                             | Lapatinib, Pertuzumab, Trastuzumab, Ado-Trastuzumab Emtansine, Neratinib                                                                                              |
| GBC020    | KRAS <sup>G13D</sup>                             | Binimetinib, Trametinib, Cobimetinib, Panitumumab, Cetuximab                                                                                                          |
| GBC023    | ERBB2 <sup>V842I, D1058G</sup>                   | Neratinib, Ado-Trastuzumab Emtansine                                                                                                                                  |
| GBC024    | PIK3CA <sup>H1047R</sup>                         | Fulvestrant, Alpelisib, Buparlisib, Taselisib, Copanlisib, GDC-0077, Serabelisib, Taselisib                                                                           |
| GBC026    | PIK3CA <sup>P104T</sup>                          | Fulvestrant, Alpelisib, Buparlisib, Taselisib, Copanlisib, GDC-0077, Serabelisib, Taselisib                                                                           |
| GBC029    | ELF3 <sup>V345fs</sup> ; PIK3CA <sup>E545K</sup> | Fulvestrant, Alpelisib, Buparlisib, Taselisib, Copanlisib, GDC-0077, Serabelisib, Taselisib                                                                           |
| GBC030    | ERBB2 <sup>AMP, L869R</sup>                      | Lapatinib, Pertuzumab, Trastuzumab, Ado-Trastuzumab Emtansine, Neratinib                                                                                              |
| GBC038    | ERBB2 <sup>S310Y</sup>                           | Neratinib, Ado-Trastuzumab Emtansine                                                                                                                                  |
| GBC044    | ERBB2 <sup>AMP</sup>                             | Lapatinib, Pertuzumab, Trastuzumab, Ado-Trastuzumab Emtansine, Neratinib                                                                                              |
| GBC049    | KRAS <sup>G12A</sup>                             | Binimetinib, Trametinib, Cobimetinib, Panitumumab, Cetuximab                                                                                                          |
| GBC062    | ERBB2 <sup>V842I</sup>                           | Neratinib, Ado-Trastuzumab Emtansine                                                                                                                                  |
| GBC065    | ERBB2 <sup>S310F</sup>                           | Neratinib, Ado-Trastuzumab Emtansine                                                                                                                                  |
| GBC066    | ELF3 <sup>Y19fs</sup>                            | Potential cancer vaccine candidate                                                                                                                                    |
| GBC071    | ERBB2 <sup>S310Y, E286K</sup>                    | Neratinib, Ado-Trastuzumab Emtansine                                                                                                                                  |
| GBC080    | ERBB2 <sup>AMP</sup>                             | Lapatinib, Pertuzumab, Trastuzumab, Ado-Trastuzumab Emtansine, Neratinib                                                                                              |
| GBC082    | PIK3CA <sup>E542K</sup>                          | Fulvestrant, Alpelisib, Buparlisib, Taselisib, Copanlisib, GDC-0077, Serabelisib, Taselisib                                                                           |
| GBC086    | KRAS <sup>G12A</sup>                             | Binimetinib, Trametinib, Cobimetinib, Panitumumab, Cetuximab                                                                                                          |
| GBC089    | ERBB2 <sup>Q709L</sup>                           | Neratinib, Ado-Trastuzumab Emtansine                                                                                                                                  |
| GBC093    | ERBB2 <sup>S310Y</sup> ; KRAS <sup>A146V</sup>   | Neratinib, Ado-Trastuzumab Emtansine, Binimetinib, Trametinib, Cobimetinib, Panitumumab, Cetuximab                                                                    |
| GBC095    | ERBB2 <sup>AMP</sup>                             | Lapatinib, Pertuzumab, Trastuzumab, Ado-Trastuzumab Emtansine, Neratinib                                                                                              |
| GBC098    | ERBB2 <sup>AMP</sup>                             | Lapatinib, Pertuzumab, Trastuzumab, Ado-Trastuzumab Emtansine, Neratinib                                                                                              |
| GBC099    | ERBB2 <sup>S310F</sup>                           | Neratinib, Ado-Trastuzumab Emtansine                                                                                                                                  |
| GBC105    | ERBB2 <sup>AMP</sup>                             | Lapatinib, Pertuzumab, Trastuzumab, Ado-Trastuzumab Emtansine, Neratinib                                                                                              |
| GBC107    | ERBB2 <sup>AMP</sup> ; PIK3CA <sup>E453K</sup>   | Lapatinib, Pertuzumab, Trastuzumab, Ado-Trastuzumab Emtansine, Neratinib, Fulvestrant, Alpelisib, Buparlisib, Taselisib, Copanlisib, GDC-0077, Serabelisib, Taselisib |
| GBC108    | ERBB2 <sup>AMP</sup>                             | Lapatinib, Pertuzumab, Trastuzumab, Ado-Trastuzumab Emtansine, Neratinib                                                                                              |
| GBC110    | ERBB2 <sup>AMP</sup>                             | Lapatinib, Pertuzumab, Trastuzumab, Ado-Trastuzumab Emtansine, Neratinib                                                                                              |
| GBC116    | ERBB2 <sup>AMP, D277Y</sup>                      | Lapatinib, Pertuzumab, Trastuzumab, Ado-Trastuzumab Emtansine, Neratinib                                                                                              |

|        |                                                |                                                            |
|--------|------------------------------------------------|------------------------------------------------------------|
| GBC117 | ERBB2 <sup>S310F</sup>                         | Neratinib, Ado-Trastuzumab Emtansine                       |
| GBC122 | ERBB2 <sup>AMP</sup>                           | Lapatinib, Pertuzumab, Trastuzumab, Ado-                   |
| GBC128 | BRAF <sup>G469V</sup>                          | Trastuzumab Emtansine, Neratinib                           |
| GBC131 | ERBB2 <sup>S310F</sup>                         | Cobimetinib, PLX8394                                       |
| GBC132 | ERBB2 <sup>S310F, D277A</sup>                  | Neratinib, Ado-Trastuzumab Emtansine                       |
| GBC135 | ERBB2 <sup>V777L</sup>                         | Neratinib, Ado-Trastuzumab Emtansine                       |
| GBC136 | ERBB2 <sup>AMP, D769Y</sup>                    | Lapatinib, Pertuzumab, Trastuzumab, Ado-                   |
| GBC137 | ERBB2 <sup>AMP</sup>                           | Trastuzumab Emtansine, Neratinib                           |
| GBC139 | ERBB2 <sup>AMP, S310F</sup>                    | Lapatinib, Pertuzumab, Trastuzumab, Ado-                   |
| GBC140 | ERBB2 <sup>AMP, S310Y</sup>                    | Trastuzumab Emtansine, Neratinib                           |
| GBC144 | ERBB2 <sup>S310Y, I788V, H1044Q</sup>          | Lapatinib, Pertuzumab, Trastuzumab, Ado-                   |
| GBC146 | ERBB2 <sup>V842I</sup>                         | Trastuzumab Emtansine, Neratinib                           |
| GBC147 | ERBB2 <sup>AMP</sup>                           | Neratinib, Ado-Trastuzumab Emtansine                       |
| GBC149 | ERBB2 <sup>AMP, S310Y</sup>                    | Lapatinib, Pertuzumab, Trastuzumab, Ado-                   |
| GBC150 | TP53 <sup>G154V</sup>                          | Trastuzumab Emtansine, Neratinib                           |
| GBC171 | ERBB2 <sup>AMP</sup>                           | Potential cancer vaccine candidate                         |
| GBC187 | KRAS <sup>G12D</sup> ; PIK3CA <sup>E545K</sup> | Lapatinib, Pertuzumab, Trastuzumab, Ado-                   |
| GBC192 | ERBB2 <sup>S310Y</sup>                         | Trastuzumab Emtansine, Neratinib                           |
| GBC197 | KRAS <sup>G12A</sup>                           | Binimetinib, Trametinib, Cobimetinib, Panitumumab,         |
| GBC200 | ERBB2 <sup>AMP</sup>                           | Cetuximab, Fulvestrant, Alpelisib, Buparlisib, Taselisib,  |
| GBC203 | ERBB2 <sup>AMP</sup>                           | Copanlisib, GDC-0077, Serabelisib, Taselisib               |
| GBC208 | PIK3CA <sup>E545K</sup>                        | Neratinib, Ado-Trastuzumab Emtansine                       |
| GBC218 | ERBB2 <sup>AMP</sup>                           | Binimetinib, Trametinib, Cobimetinib, Panitumumab,         |
|        |                                                | Cetuximab                                                  |
|        |                                                | Lapatinib, Pertuzumab, Trastuzumab, Ado-                   |
|        |                                                | Trastuzumab Emtansine, Neratinib                           |
|        |                                                | Lapatinib, Pertuzumab, Trastuzumab, Ado-                   |
|        |                                                | Trastuzumab Emtansine, Neratinib                           |
|        |                                                | Fulvestrant, Alpelisib, Buparlisib, Taselisib, Copanlisib, |
|        |                                                | GDC-0077, Serabelisib, Taselisib                           |
|        |                                                | Lapatinib, Pertuzumab, Trastuzumab, Ado-                   |
|        |                                                | Trastuzumab Emtansine, Neratinib                           |

## References

- 1 Alexandrov, L. B., Nik-Zainal, S., Wedge, D. C., Campbell, P. J. & Stratton, M. R. Deciphering signatures of mutational processes operative in human cancer. *Cell reports* **3**, 246-259, doi:10.1016/j.celrep.2012.12.008 (2013).
- 2 Aran, D., Hu, Z. & Butte, A. J. xCell: digitally portraying the tissue cellular heterogeneity landscape. *Genome Biol* **18**, 220, doi:10.1186/s13059-017-1349-1 (2017).
- 3 Dees, N. D. et al. MuSiC: identifying mutational significance in cancer genomes. *Genome Res.* **22**, 1589-1598, doi:10.1101/gr.134635.111 (2012).
