# Supplementary material for: Integrated genomic analysis reveals mutated ELF3 as a potential gallbladder cancer vaccine candidate
Source: PubMed Central journal article supplement (PMC7445288; doi:10.1038/s41467-020-17880-4), 2020-08-24
Supplement: 41467_2020_17880_MOESM2_ESM.pdf [file 41467_2020_17880_MOESM2_ESM.pdf]

## **Descriptions of Additional Supplementary Files**

### **Supplementary Data 1**

**Description:** Sample information

### **Supplementary Data 2**

**Description:** Sample-level exome coverage statistics

### **Supplementary Data 3**

**Description:** Somatic mutations in paired GBC samples

### **Supplementary Data 4**

**Description:** Putative somatic mutations in GBC samples without matched normal tissue

### **Supplementary Data 5**

**Description:** Somatic mutations in Cholecystitis, Gall stone and polyp samples

### **Supplementary Data 6**

**Description:** Mutations in GBC cell lines

### **Supplementary Data 7**

**Description:** Disease relevant germline mutations in GBC patients

### **Supplementary Data 8**

**Description:** Hotspot mutations in GBCs

### **Supplementary Data 9**

**Description:** Hotspots identified through meta-analysis

### **Supplementary Data 10**

**Description:** Cancer specific neoantigens predicted in GBCs

### **Supplementary Data 11**

**Description:** TCR clonal expansion assessment

### **Supplementary Data 12**

**Description:** TCR clonal expansion assessment

### **Supplementary Data 13**

**Description:** Tumor infiltrating lymphocytic cells
